# Supplementary material
Source: PubMed Central journal article supplement (PMC3579516)
Supplement: NIHMS180887-supplement-Supplementary_Data.pdf [file NIHMS180887-supplement-Supplementary_Data.pdf]

## **Supplementary Material**

### **The Alliance for Cellular Signaling plasmid collection: a flexible resource for protein localization studies and signaling pathway analysis.**

Joelle R. Zavzavadjian<sup>1</sup>, Sam Couture<sup>1</sup>, Wei Sun Park<sup>2</sup>, James Whalen<sup>2</sup>, Stephen Lyon<sup>3</sup>, Genie Lee<sup>1</sup>, Eileen Fung<sup>1</sup>, Qingli Mi<sup>1</sup>, Jamie Liu<sup>1</sup>, Estelle Wall<sup>1</sup>, Leah Santat<sup>1</sup>, Kavitha Dhandapani<sup>1</sup>, Christine Kivork<sup>1</sup>, Adrienne Driver<sup>1</sup>, Xiaocui Zhu<sup>1</sup>, Mi Sook Chang<sup>1</sup>, Baljinder Randhawa<sup>1</sup>, Elizabeth Gehrig<sup>2</sup>, Heather Bryan<sup>2</sup>, Mary Verghese<sup>2</sup>, Andreia Maer<sup>3</sup>, Brian Saunders<sup>3</sup>, Yuhong Ning<sup>3</sup>, Shankar Subramaniam<sup>3</sup>, Tobias Meyer<sup>2</sup>, Melvin I. Simon<sup>1</sup>, Nancy O'Rourke<sup>2</sup>, Grischa Chandy<sup>2</sup> and Iain D.C. Fraser<sup>1\*</sup>

The Alliance for Cellular Signaling, <sup>1</sup>Molecular Biology Laboratory, California Institute of Technology, Pasadena CA 91125; <sup>2</sup>Microscopy Laboratory, Stanford University, Palo Alto CA 94305; <sup>3</sup>Bioinformatics and Data Coordination Laboratory, University of California San Diego, La Jolla CA 92093.

\*Corresponding author: Iain D.C. Fraser, Tel: 626 395 4901, Fax: 626 796 7066, email: [fraseri@caltech.edu](mailto:fraseri@caltech.edu)

## Supplementary Figure 1

*Expression vector record and plasmid map from the AfCS plasmid database. a) Plasmid map as generated by the AfCS plasmid database for the N form of Pak5 tagged with YFP at the C-terminus. Relevant features are listed in addition to predicted digest pattern with NcoI restriction enzyme. b) Construct record as generated by the AfCS plasmid database for the N form of Pak5 tagged with YFP at the C-terminus. In addition to the upper panel detailing key construct information such as barcode, sequence and feature locations, the record also carries information specific to the cloned gene (N form of Pak5) and the parent vector (EF1 promoter driven, YFP C-terminal fusion).*

1A

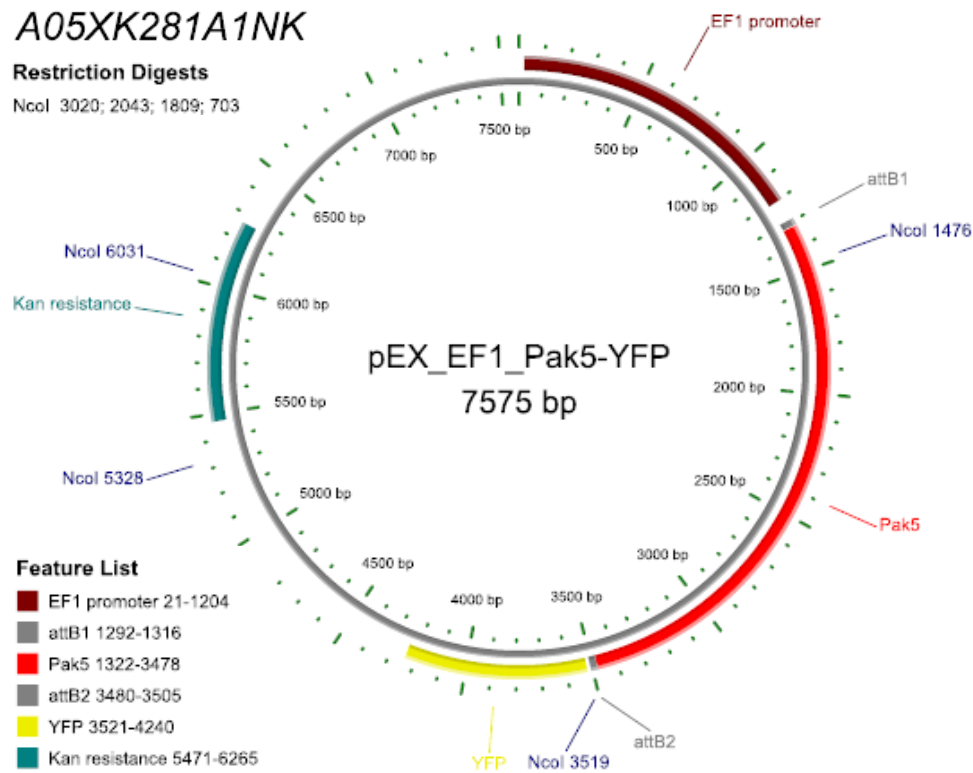

| home                         |  | signaling update                                                                                                |  | molecule pages |  | data center |  | about us |  | logout     |  |            |                      |        |  |
|------------------------------|--|-----------------------------------------------------------------------------------------------------------------|--|----------------|--|-------------|--|----------|--|------------|--|------------|----------------------|--------|--|
| AfCS<br>nature               |  | thesignalinggateway                                                                                             |  | registration   |  | e-alert     |  | help     |  | contact us |  | site guide |                      | SEARCH |  |
| PLASMID                      |  | information                                                                                                     |  | browse         |  | search      |  | blast    |  |            |  |            |                      |        |  |
| ▶ plasmid map                |  |                                                                                                                 |  |                |  |             |  |          |  |            |  |            |                      |        |  |
|                              |  |                                                                                                                 |  |                |  |             |  |          |  |            |  |            | <b>construct</b>     |        |  |
| construct name               |  | pEX_EF1_Pak5-YFP                                                                                                |  |                |  |             |  |          |  |            |  |            |                      |        |  |
| barcode                      |  | A05XK281A1NK                                                                                                    |  |                |  |             |  |          |  |            |  |            |                      |        |  |
| atcc id                      |  |                                                                                                                 |  |                |  |             |  |          |  |            |  |            |                      |        |  |
| vector type                  |  | X (Expression vector)                                                                                           |  |                |  |             |  |          |  |            |  |            |                      |        |  |
| vector sequence              |  | <a href="#">&lt;view&gt;</a>                                                                                    |  |                |  |             |  |          |  |            |  |            |                      |        |  |
| vector size                  |  | 7575                                                                                                            |  |                |  |             |  |          |  |            |  |            |                      |        |  |
| feature list                 |  | EF1 promoter 21-1204; attB1 1292-1316; Pak5 1322-3478; attB2 3480-3505; YFP 3521-4240; Kan resistance 5471-6265 |  |                |  |             |  |          |  |            |  |            |                      |        |  |
| restriction digests          |  | NcoI 3020; 2043; 1809; 703                                                                                      |  |                |  |             |  |          |  |            |  |            |                      |        |  |
|                              |  |                                                                                                                 |  |                |  |             |  |          |  |            |  |            | <b>cloned gene</b>   |        |  |
| gene alias <sup>1</sup>      |  | K281                                                                                                            |  |                |  |             |  |          |  |            |  |            |                      |        |  |
| gene name                    |  | Pak5                                                                                                            |  |                |  |             |  |          |  |            |  |            |                      |        |  |
| synonyms                     |  | KIAA1264; p21-Activated kinase 5; PAK-5; Pak5; Serine/threonine-protein kinase PAK 5                            |  |                |  |             |  |          |  |            |  |            |                      |        |  |
| afcs id                      |  | A000829                                                                                                         |  |                |  |             |  |          |  |            |  |            |                      |        |  |
| species                      |  | Mouse                                                                                                           |  |                |  |             |  |          |  |            |  |            |                      |        |  |
| gene form <sup>2</sup>       |  | [N] No termination codon                                                                                        |  |                |  |             |  |          |  |            |  |            |                      |        |  |
| gene version                 |  | [A1] Full Length; wildtype                                                                                      |  |                |  |             |  |          |  |            |  |            |                      |        |  |
| version description          |  |                                                                                                                 |  |                |  |             |  |          |  |            |  |            |                      |        |  |
| RNAi target sequence         |  |                                                                                                                 |  |                |  |             |  |          |  |            |  |            |                      |        |  |
| source material              |  | Brain cDNA                                                                                                      |  |                |  |             |  |          |  |            |  |            |                      |        |  |
| strain                       |  | Balb/C                                                                                                          |  |                |  |             |  |          |  |            |  |            |                      |        |  |
| output name insert           |  | Pak5                                                                                                            |  |                |  |             |  |          |  |            |  |            |                      |        |  |
| target orf v afcs orf        |  |                                                                                                                 |  |                |  |             |  |          |  |            |  |            |                      |        |  |
| orf source                   |  | Celera                                                                                                          |  |                |  |             |  |          |  |            |  |            |                      |        |  |
| orf id                       |  | AfCS Assembled                                                                                                  |  |                |  |             |  |          |  |            |  |            |                      |        |  |
| target orf                   |  | <a href="#">&lt;view&gt;</a>                                                                                    |  |                |  |             |  |          |  |            |  |            |                      |        |  |
| afcs orf                     |  | <a href="#">&lt;view&gt;</a>                                                                                    |  |                |  |             |  |          |  |            |  |            |                      |        |  |
| molecular weight             |  | 80950.5                                                                                                         |  |                |  |             |  |          |  |            |  |            |                      |        |  |
| protein sequence             |  | <a href="#">&lt;view&gt;</a>                                                                                    |  |                |  |             |  |          |  |            |  |            |                      |        |  |
|                              |  |                                                                                                                 |  |                |  |             |  |          |  |            |  |            | <b>parent vector</b> |        |  |
| barcode                      |  | A05DFXBYFPNK                                                                                                    |  |                |  |             |  |          |  |            |  |            |                      |        |  |
| atcc id                      |  | 10326350                                                                                                        |  |                |  |             |  |          |  |            |  |            |                      |        |  |
| construct name               |  | pDS_EF1-XB-YFP                                                                                                  |  |                |  |             |  |          |  |            |  |            |                      |        |  |
| vector type                  |  | D (Gateway destination vector)                                                                                  |  |                |  |             |  |          |  |            |  |            |                      |        |  |
| vector id                    |  | A05                                                                                                             |  |                |  |             |  |          |  |            |  |            |                      |        |  |
| vector abbreviation          |  | FXBYFP                                                                                                          |  |                |  |             |  |          |  |            |  |            |                      |        |  |
| vector details               |  | Mammalian Expression; EF1 promoter; C-terminal YFP; Minimal linker                                              |  |                |  |             |  |          |  |            |  |            |                      |        |  |
| compatible gene form         |  | N                                                                                                               |  |                |  |             |  |          |  |            |  |            |                      |        |  |
| selection bacterial          |  | Kanamycin                                                                                                       |  |                |  |             |  |          |  |            |  |            |                      |        |  |
| selection mammalian          |  | Neomycin                                                                                                        |  |                |  |             |  |          |  |            |  |            |                      |        |  |
| vector sequence              |  | <a href="#">&lt;view&gt;</a>                                                                                    |  |                |  |             |  |          |  |            |  |            |                      |        |  |
| vector size                  |  | 7067                                                                                                            |  |                |  |             |  |          |  |            |  |            |                      |        |  |
| source vector                |  | pDS_XB-YFP                                                                                                      |  |                |  |             |  |          |  |            |  |            |                      |        |  |
| gateway specific information |  | rf cassette                                                                                                     |  | B              |  |             |  |          |  |            |  |            |                      |        |  |
|                              |  | rf insert sites                                                                                                 |  | Ase I /Nhe I   |  |             |  |          |  |            |  |            |                      |        |  |
|                              |  | linearization enzyme                                                                                            |  | Sca1           |  |             |  |          |  |            |  |            |                      |        |  |
| notes                        |  |                                                                                                                 |  |                |  |             |  |          |  |            |  |            |                      |        |  |

1. Gene Alias: This is an arbitrary gene specific ID used by the AfCS to track all clones derived from the same ORF.

2. Gene Form: This allows us to differentiate between different clones derived from the same gene.

T: Clone contains a termination codon at the end of the targeted ORF and enables us to tag the protein at the N-terminus.

N: Clone does not contain a termination codon at the end of the targeted ORF and enables us to tag the protein at the C-terminus.

## **Supplementary Figure 2**

*The table structure of the AfCS plasmid database.* Schematic representing the major database tables and their relationships. The five primary tables are 'parent\_vector', 'target\_gene', 'cloned\_gene', 'construct' and 'misc\_plasmid'. The various 'batch' tables are for collecting lists of 'parent\_vector', 'cloned\_gene', 'construct', or 'plasmid\_prep' records together for common processing. The 'plasmid\_prep' and 'prep\_storage\_list' contain information about samples created in the various AfCS laboratories and their storage locations. Note that various lookup tables are not displayed in this diagram.

## Supplementary Figure 2

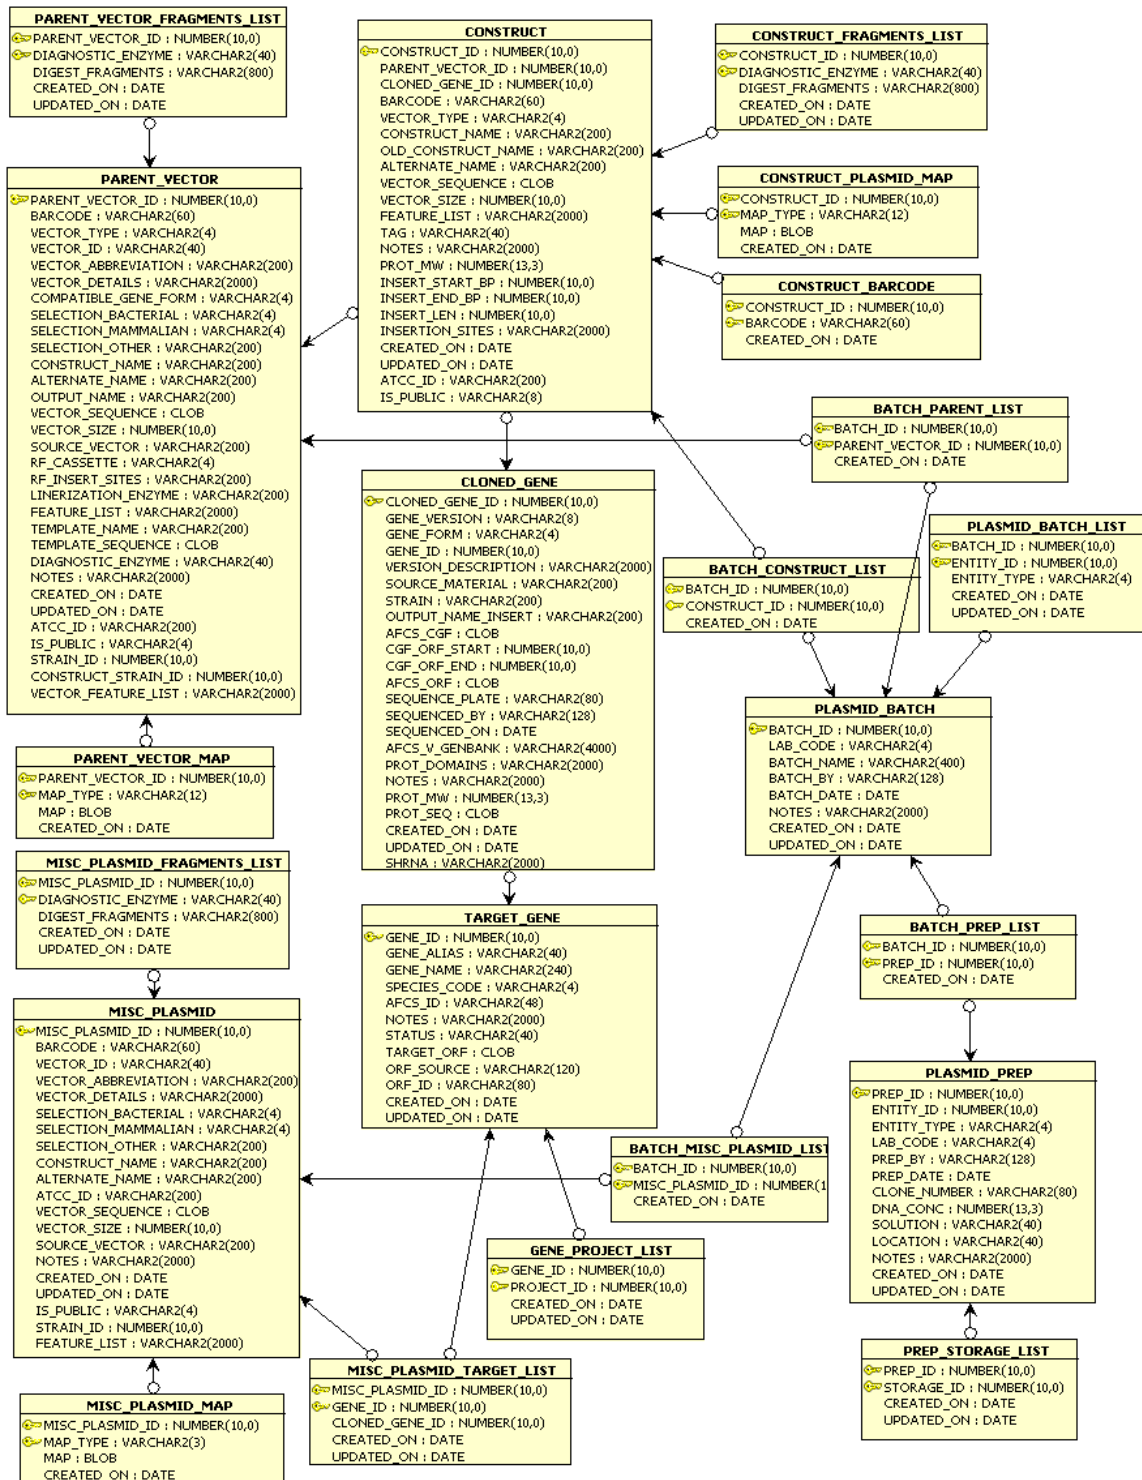

### **Supplementary Table 1**

*An example of cloning primer details for a subset of AfCS target genes (K050 to K059). Primers were generated using an 'in-house' Perl script (see methods) and vary in length to achieve a desired  $T_m$  of 70°C. The attB Gateway recombination sites are added prior to oligo synthesis. For 15 primers, note the presence of a consensus Kozak sequence (underlined) introduced upstream of the start codon. A total of 5 nucleotides are included to maintain the reading frame between the 5' end of the ORF and the attB1 site. Similarly, a single T nucleotide is included at the start of all T3 and NT3 primers to maintain reading frame between the 3' end of the ORF and the attB2 site.*

**Table 1**

| <u>Gene Name</u> | <u>NCBI GI number</u> | <u>AfCS ID</u> | <u>AfCS Gene Alias</u> | <u>Primer Name</u> | <u>Primer Sequence</u>                                    |
|------------------|-----------------------|----------------|------------------------|--------------------|-----------------------------------------------------------|
| NLK              | 6679071               | A001668        | K050                   | STK050-I5          | <u>CCACCATGGCGGCTTACAATGGCGGTACATCTGCA</u>                |
|                  |                       |                |                        | STK050-T3          | TTCACTCCCACACCAGAGGAGACGGCGG                              |
|                  |                       |                |                        | STK050-NT3         | TCTCCCACACCAGAGGAGACGGCGGC                                |
| PKC $\beta$ 2    | 6679344               | A001921        | K051                   | STK051-I5          | <u>CCACCATGGCTGACCCGGCTGCGGGG</u>                         |
|                  |                       |                |                        | STK051-T3          | TTTAGCTCTTGACTTCAGGTTTTAAAAATTCAGAGTTAACAAAGGAAAATCCTTCGA |
|                  |                       |                |                        | STK051-NT3         | TGCTCTTGACTTCAGGTTTTAAAAATTCAGAGTTAACAAAGGAAAATCCTTCGA    |
| PKC $\eta$       | 6679346               | A001926        | K052                   | STK052-I5          | <u>CCACCATGTCGTCCGGCAGCATGAAGTTCAATGGC</u>                |
|                  |                       |                |                        | STK052-T3          | TCTACAGTTGCAATTCGGGTGACACATAGGAAAAGTTTCTAAACTCATCC        |
|                  |                       |                |                        | STK052-NT3         | TCAGTTGCAATTCGGGTGACACATAGGAAAAGTTTCTAAACTCATCC           |
| PKC $\lambda$    | 6679348               | A001929        | K053                   | STK053-I5          | <u>CCACCATGTCCCACACGGTCGCGTGCGG</u>                       |
|                  |                       |                |                        | STK053-T3          | TTCAGACACACTCTTCTGCAGACATCAAGAGGGGGTTG                    |
|                  |                       |                |                        | STK053-NT3         | TGACACACTCTTCTGCAGACATCAAGAGGGGGTTGATATACTCA              |
| PKC $\mu$ 1      | 6679350               | A001930        | K054                   | STK054-I5          | <u>CCACCATGAGCGTCCCTCCGCTGCTGCGA</u>                      |
|                  |                       |                |                        | STK054-T3          | TTCAGAGGATGCTGACACGCTCACTGAGGGC                           |
|                  |                       |                |                        | STK054-NT3         | TGAGGATGCTGACACGCTCACTGAGGGCTTTCA                         |
| PKC $\theta$     | 6679352               | A001933        | K055                   | STK055-I5          | <u>CCACCATGTACCCTTTCTTTCGAATCGGTTTATCCAACCTTTGACTG</u>    |
|                  |                       |                |                        | STK055-T3          | TTCAGGAGCAAATGAGAGTCTCCATCCCTGGGTTAATG                    |
|                  |                       |                |                        | STK055-NT3         | TGGAGCAAATGAGAGTCTCCATCCCTGGGTTAATGAAGG                   |
| PKC $\zeta$      | 6679354               | A001934        | K056                   | STK056-I5          | <u>CCACCATGCCCAGCAGGACGGACCCCAAGATG</u>                   |
|                  |                       |                |                        | STK056-T3          | TTCACACGGACTCCTCAGCAGACAGCAGAAGTGG                        |
|                  |                       |                |                        | STK056-NT3         | TCACGGACTCCTCAGCAGACAGCAGAAGTGGG                          |
| Prkg2            | 6679466               | A000044        | K057                   | STK057-I5          | <u>CCACCATGGGAAATGGTTTCAGTGAAGCCCAAGCATGC</u>             |
|                  |                       |                |                        | STK057-T3          | TTCAGAAGTCTTTATCCCAGCCTGACATTTTCATCCGGA                   |
|                  |                       |                |                        | STK057-NT3         | TGAAGTCTTTATCCCAGCCTGACATTTTCATCCGGAGGC                   |
| Akt2             | 6680673               | A000250        | K058                   | STK058-I5          | <u>CCACCATGAATGAGGTATCTGTTCATCAAAGAAGGCTGGCTCCACA</u>     |
|                  |                       |                |                        | STK058-T3          | TTCACTCTCGGATGCTGGCTGAGTAGGAGAACTGGG                      |
|                  |                       |                |                        | STK058-NT3         | TCTCTCGGATGCTGGCTGAGTAGGAGAACTGGGG                        |
| Cdk5             | 6680907               | A000609        | K059                   | STK059-I5          | <u>CCACCATGCAGAAATACGAGAACTGGAGAAGATTGGGGAAGGC</u>        |
|                  |                       |                |                        | STK059-T3          | TCTATGGGGACAGAAGTCAGAGAAGTAGGGGTGCTGC                     |
|                  |                       |                |                        | STK059-NT3         | TTGGGGGACAGAAGTCAGAGAAGTAGGGGTGCTGC                       |

## Supplementary Table 2

An example of sequence primer details for a subset of AfCS target genes (K050 to K059).

Output of sequencing primers sequence for K050 to K059 as generated by a customized

Primer3 script (see methods). Gene-specific sequencing primers vary in length from 18- to 21-mers. Primers labeled as +1, +2, +3, etc. prime along the forward strand while those labeled as -1, -2, -3, etc. anneal to the reverse strand of the cloned gene. Primer position is relative to the ATG initiation codon.

| <u>Gene Name</u> | <u>NCBI GI number</u> | <u>AfCS ID</u> | <u>AfCS Gene Alias</u> | <u>Primer Name</u> | <u>Primer Sequence</u> | <u>Primer position</u> |
|------------------|-----------------------|----------------|------------------------|--------------------|------------------------|------------------------|
| NLK              | 6679071               | A001668        | K050                   | STK050_+1          | ATCCAAGAGATGGAAAGAGAG  | 433                    |
|                  |                       |                |                        | STK050_+2          | AGTTACTCAGTATTACCGGGC  | 866                    |
|                  |                       |                |                        | STK050_-1          | GATCAAAGACCAACATCCTG   | 1197                   |
|                  |                       |                |                        | STK050_-2          | ACTCTGCATCAATTCTGTGAC  | 635                    |
| PKC $\beta$ 2    | 6679344               | A001921        | K051                   | STK051_+1          | TGTATGGACTTATTCACCAGG  | 364                    |
|                  |                       |                |                        | STK051_+2          | GAAGTTTGAGAGAGCCAAGAT  | 908                    |
|                  |                       |                |                        | STK051_+3          | CAGAGCAAGGGCATTATTTAC  | 1371                   |
|                  |                       |                |                        | STK051_-1          | CATGATGACTGGAAGAGTTC   | 1661                   |
|                  |                       |                |                        | STK051_-2          | AGAGTTCATCTGTACCCTTCC  | 1101                   |
|                  |                       |                |                        | STK051_-3          | ATTCCACTCTGGATTGAGG    | 671                    |
| PKC $\eta$       | 6679346               | A001926        | K052                   | STK052_+1          | GGTAATAACCCTAACAGGGAG  | 395                    |
|                  |                       |                |                        | STK052_+2          | ATTTCTCCAACCTCGAAACT   | 945                    |
|                  |                       |                |                        | STK052_+3          | CATGTTCTTACATGAGAAAGG  | 1400                   |
|                  |                       |                |                        | STK052_-1          | AGTATGGCCTCAAAAAGGTC   | 1699                   |
|                  |                       |                |                        | STK052_-2          | GTGCACTCTACATCATCATCC  | 1198                   |
|                  |                       |                |                        | STK052_-3          | AGTGCAGGCTGTAACAATTAG  | 668                    |
| PKC $\lambda$    | 6679348               | A001929        | K053                   | STK053_+1          | GGTGGAGAAAGCTGTATTGT   | 364                    |
|                  |                       |                |                        | STK053_+2          | ACAGAGAAGCATGTGTTTGAG  | 870                    |
|                  |                       |                |                        | STK053_+3          | AAAGCAGCAAGTGTACTGAAG  | 1431                   |
|                  |                       |                |                        | STK053_-1          | CTCTGTGTTTTGGTCAGGAT   | 1370                   |
|                  |                       |                |                        | STK053_-2          | CGAGCTCTTTCTTCACAAC    | 837                    |
|                  |                       |                |                        | STK053_-3          | GAAAAGTGTGGCCATTG      | 402                    |
| PKC $\mu$ 1      | 6679350               | A001930        | K054                   | STK054_+1          | AGGGTGATCTCATTGAAGTG   | 367                    |
|                  |                       |                |                        | STK054_+2          | GATTGCAGATTCAACTGTCAC  | 924                    |
|                  |                       |                |                        | STK054_+3          | CACTCTTCCAAAATGACACAG  | 1372                   |
|                  |                       |                |                        | STK054_+4          | GAAAGTCAGCTTCGTAATGAG  | 1887                   |
|                  |                       |                |                        | STK054_+5          | GTGGTACCTTCCCTTTTAATG  | 2350                   |
|                  |                       |                |                        | STK054_-1          | GTACCACTCAGGCTCATATAG  | 2356                   |
|                  |                       |                |                        | STK054_-2          | CGAAGCTGACTTTCTTGTTT   | 1900                   |
|                  |                       |                |                        | STK054_-3          | CTGTGTCATTTTGGAAAGAGTG | 1392                   |
|                  |                       |                |                        | STK054_-4          | CACCTTCACCTTAGACATCAG  | 824                    |
|                  |                       |                |                        | STK054_-5          | CTGGAAGTCTTCGAAGGTG    | 422                    |



| <b>Gene Name</b> | <b>NCBI GI number</b> | <b>AfCS ID</b> | <b>AfCS Gene Alias</b> | <b>Primer Name</b> | <b>Primer Sequence</b> | <b>Primer position</b> |
|------------------|-----------------------|----------------|------------------------|--------------------|------------------------|------------------------|
| PKC $\theta$     | 6679352               | A001933        | K055                   | STK055_+1          | AGGACATGAGTGAGTTTGAGA  | 385                    |
|                  |                       |                |                        | STK055_+2          | CTCCTTACGAGATTCAGAACA  | 905                    |
|                  |                       |                |                        | STK055_+3          | CGACTTAATGTACCACATCCA  | 1391                   |
|                  |                       |                |                        | STK055_+4          | GAAGAGCTTGAAAGGAAAGAG  | 1917                   |
|                  |                       |                |                        | STK055_-1          | AGCATCTCATAAACGAGCAC   | 1717                   |
|                  |                       |                |                        | STK055_-2          | ATCCATCAACACCACATCTT   | 1256                   |
|                  |                       |                |                        | STK055_-3          | TAGACTTGAATCTGTGTGGC   | 709                    |
|                  |                       |                |                        | STK055_-4          | AGTAGAGTTCCACGGTTGTTT  | 270                    |
| PKC $\zeta$      | 6679354               | A001934        | K056                   | STK056_+1          | AAGATGGAGGAAGCTGTACC   | 359                    |
|                  |                       |                |                        | STK056_+2          | GAGAAACATGTGTTTGAGCAG  | 897                    |
|                  |                       |                |                        | STK056_+3          | CACTGAAGACTACCTTTTCCA  | 1382                   |
|                  |                       |                |                        | STK056_-1          | TGGAAAAGGTAGTCTTCAGTG  | 1402                   |
|                  |                       |                |                        | STK056_-2          | CTCCTTCTTTACCACCTTCAT  | 857                    |
|                  |                       |                |                        | STK056_-3          | GTACGCTCCCCTGTAAA      | 428                    |
| Prkg2            | 6679466               | A000044        | K057                   | STK057_+1          | AACCTATGACCTCAACAAACC  | 395                    |
|                  |                       |                |                        | STK057_+2          | CTAACCAAGATCATTGACTGC  | 882                    |
|                  |                       |                |                        | STK057_+3          | GAGTGGAGCTTGTTAAAGTGA  | 1396                   |
|                  |                       |                |                        | STK057_+4          | GACATGACTTCAGTGTGGATT  | 1876                   |
|                  |                       |                |                        | STK057_-1          | AGGAGCTCATAGACCAGAATC  | 1930                   |
|                  |                       |                |                        | STK057_-2          | TCACTTAAACAAGCTCCACTC  | 1416                   |
|                  |                       |                |                        | STK057_-3          | TAGTATCCACTTCCAAGCAG   | 919                    |
|                  |                       |                |                        | STK057_-4          | GGTTTGTGAGGTCATAGGTT   | 415                    |
| Akt2             | 6680673               | A000250        | K058                   | STK058_+1          | AGTGACTCTTCCACATCTGAG  | 381                    |
|                  |                       |                |                        | STK058_+2          | GATCACTGACTTTGGCTTGT   | 869                    |
|                  |                       |                |                        | STK058_-1          | GCCACACATCATCTCATACAT  | 1037                   |
|                  |                       |                |                        | STK058_-2          | CAGGATCTTCATGGCATAAT   | 548                    |
| Cdk5             | 6680907               | A000609        | K059                   | STK059_+1          | GTGCTACATAGGGACCTGAA   | 363                    |
|                  |                       |                |                        | STK059_-1          | TGACCACCTCAGCAGAGTA    | 489                    |

### Supplementary Table 3

*Details of AfCS parent vectors available from the ATCC. Both AfCS barcodes and ATCC IDs are shown for cross-reference.*

| <b>Construct name</b> | <b>Construct barcode</b> | <b>ATCC ID</b> | <b>Parent vector details</b>                                                                                        |
|-----------------------|--------------------------|----------------|---------------------------------------------------------------------------------------------------------------------|
| pDS_GFP-XB            | A26DCGFPXBTK             | 10326342       | Mammalian Expression; CMV promoter; N-terminal GFP;                                                                 |
| pDS_CFP-XB            | A04DCCFPXBTK             | 10326343       | Mammalian Expression; CMV promoter; N-terminal CFP;                                                                 |
| pDS_YFP-XB            | A03DCYFPXBTK             | 10326344       | Mammalian Expression; CMV promoter; N-terminal YFP;                                                                 |
| pDS_XB-GFP            | A25DCXBGFPNK             | 10326345       | Mammalian Expression; CMV promoter; C-terminal GFP;                                                                 |
| pDS_XB-CFP            | A02DCXBCFPNK             | 10326346       | Mammalian Expression; CMV promoter; C-terminal CFP;                                                                 |
| pDS_XB-YFP            | A01DCXBYFPNK             | 10326347       | Mammalian Expression; CMV promoter; C-terminal YFP;                                                                 |
| pDS_EF1-GFP-XB        | A28DFGFPXBTK             | 10326348       | Mammalian Expression; EF1 promoter; N-terminal GFP;                                                                 |
| pDS_EF1-XB-GFP        | A27DFXBGFPNK             | 10326349       | Mammalian Expression; EF1 promoter; C-terminal GFP;                                                                 |
| pDS_EF1-XB-YFP        | A05DFXBYFPNK             | 10326350       | Mammalian Expression; EF1 promoter; C-terminal YFP;                                                                 |
| pDS_EF1-YFP-XB        | A08DFYFPXBTK             | 10326351       | Mammalian Expression; EF1 promoter; N-terminal YFP;                                                                 |
| pDS_EF1-CFP-XB        | A07DFCFPXBTK             | 10326352       | Mammalian Expression; EF1 promoter; N-terminal CFP;                                                                 |
| pDS_EF1-XB-CFP        | A06DFXBCFPNK             | 10326353       | Mammalian Expression; EF1 promoter; C-terminal CFP;                                                                 |
| pDS_FLAG-X            | A38DCFLAGXTK             | 10326336       | Mammalian Expression; CMV promoter; N-terminal Flag epitope;                                                        |
| pDS_X-FLAG            | A37DCXFLAGNK             | 10326337       | Mammalian Expression; CMV promoter; C-terminal Flag epitope;                                                        |
| pDS_HA-X              | A40DC00HAXTK             | 10326338       | Mammalian Expression; CMV promoter; N-terminal HA epitope;                                                          |
| pDS_X-HA              | A39DC00XHANK             | 10326340       | Mammalian Expression; CMV promoter; C-terminal HA epitope;                                                          |
| pDS_Myc-X             | A42DC0MYCXTK             | 10326339       | Mammalian Expression; CMV promoter; N-terminal Myc epitope;                                                         |
| pDS_X-Myc             | A41DC0MYCNK              | 10326341       | Mammalian Expression; CMV promoter; C-terminal Myc epitope;                                                         |
| pDS_MSCVmacs4-FTM-XB  | A45DLMSCFXTA             | 10326354       | Retroviral Mammalian Expression; mscv 5'LTR promoter; N-terminal Flag-TEV-Myc tag; Bicistronic CD4 expression       |
| pDS_MSCVmacs4-XB-MTF  | A52DLMSCXMNA             | 10326358       | Retroviral Mammalian Expression; mscv 5'LTR promoter; C-terminal Myc-TEV-Flag tag; Bicistronic CD4 expression       |
| pDS_MSCVmacs4-TAP-XB  | A55DLMSCTXTA             | 10326361       | Retroviral Mammalian Expression; mscv 5'LTR promoter; N-terminal TAP tag; Bicistronic CD4 expression                |
| pDS_MSCVmacs4-XB-TAP  | A49DLMSCXTNA             | 10326355       | Retroviral Mammalian Expression; mscv 5'LTR promoter; C-terminal TAP tag; Bicistronic CD4 expression                |
| pDS_LPCX-FTM-XB       | A51DCLPCFXTA             | 10326357       | Retroviral Mammalian Expression; CMV promoter; N-terminal Flag-TEV-Myc tag                                          |
| pDS_LPCX-XB-MTF       | A53DCLPCXMNA             | 10326359       | Retroviral Mammalian Expression; CMV promoter; C-terminal Myc-TEV-Flag tag                                          |
| pDS_LPCX-TAP-XB       | A54DCLPCTXTA             | 10326360       | Retroviral Mammalian Expression; CMV promoter; N-terminal TAP tag                                                   |
| pDS_LPCX-XB-TAP       | A50DCLPCXTNA             | 10326356       | Retroviral Mammalian Expression; CMV promoter; C-terminal TAP tag                                                   |
| pDS_MSCVIG-FTM-XB     | A87DLMSGFXTA             | 10326365       | Retroviral Mammalian Expression; mscv 5'LTR promoter; N-terminal Flag-TEV-Myc tag; Bicistronic eGFP expression      |
| pDS_MSCVIG-XB-MTF     | A89DLMSGXMNA             | 10326367       | Retroviral Mammalian Expression; mscv 5'LTR promoter; C-terminal Myc-TEV-Flag tag; Bicistronic eGFP expression      |
| pDS_MSCVIp-FTM-XB     | A86DLMSPFXTA             | 10326364       | Retroviral Mammalian Expression; mscv 5'LTR promoter; N-terminal Flag-TEV-Myc tag; Bicistronic puromycin expression |
| pDS_MSCVIp-XB-MTF     | A88DLMSPMNA              | 10326366       | Retroviral Mammalian Expression; mscv 5'LTR promoter; C-terminal Myc-TEV-Flag tag; Bicistronic puromycin expression |

## Supplementary Table 4

*Details of AfCS cloned ORFs available from the ATCC.* The Genbank accession number for each ORF is provided. ORF clones can be obtained from the ATCC by referencing the corresponding ATCC ID. Note that 'Target sequence ID' contains the Genbank identifier for the reference sequence used for cloning primer design.

| <u>GenBank Accession</u> | <u>Gene Name</u>                             | <u>ORF size</u> | <u>AFCS ID</u> | <u>Protein category</u>                 | <u>ATCC ID</u> | <u>Species</u> | <u>Strain</u> | <u>Source material</u> | <u>Target sequence source</u> | <u>Target sequence ID (Genbank GI)</u> |
|--------------------------|----------------------------------------------|-----------------|----------------|-----------------------------------------|----------------|----------------|---------------|------------------------|-------------------------------|----------------------------------------|
| EF043589                 | N-Ras                                        | 578             | A000004        | G protein, monomeric (non-Rab)          | 10627197       | Mouse          | Balb/C        | Brain+Testis cDNA      | NCBI                          | 7242161                                |
| EF043590                 | K-Ras                                        | 563             | A000005        | G protein, monomeric (non-Rab)          | 10627198       | Mouse          | Balb/C        | Brain+Testis cDNA      | NCBI                          | 13435531                               |
| EF043591                 | G protein beta 5                             | 1187            | A000018        | G protein, heterotrimeric               | 10373546       | Mouse          | Balb/C        | Brain+Testis cDNA      | NCBI                          | 16359360                               |
| EF043592                 | Arrestin2                                    | 1256            | A000019        | Adaptor/scaffold                        | 10627209       | Mouse          | Balb/C        | Brain+Testis cDNA      | Celera                        | AfCS assembled                         |
| EF043593                 | Rgs2                                         | 635             | A000028        | GTPase activating protein, RGS          | 10627320       | Mouse          | Balb/c        | Brain+Testis cDNA      | NCBI                          | 31543585                               |
| EF043594                 | Galpha13                                     | 1133            | A000029        | G protein, heterotrimeric               | 10373467       | Mouse          | Balb/C        | Brain+Testis cDNA      | NCBI                          | 6754007                                |
| EF043595                 | C5a receptor                                 | 1055            | A000037        | Receptor, GPCR                          | 10627813       | Mouse          | Balb/C        | Spleen cDNA            | NCBI                          | 6680817                                |
| EF043596                 | Btk                                          | 1979            | A000038        | Protein kinase, tyrosine (non-receptor) | 10373537       | Mouse          | Balb/C        | Brain+Testis cDNA      | NCBI                          | 7709993                                |
| EF043597                 | Galpha12                                     | 1139            | A000039        | G protein, heterotrimeric               | 10373466       | Mouse          | Balb/C        | Brain+Testis cDNA      | NCBI                          | 6754005                                |
| EF043598                 | Syk                                          | 1889            | A000040        | Protein kinase, tyrosine (non-receptor) | 10373535       | Mouse          | Balb/C        | Brain+Testis cDNA      | NCBI                          | 6755705                                |
| EF043599                 | Jik/TAO3                                     | 2696            | A000042        | Protein kinase, Ser/Thr (non-receptor)  | 10627766       | Mouse          | Balb/C        | Brain+Testis cDNA      | Celera                        | AfCS Assembled                         |
| EF043600                 | cGMP-dependent protein kinase, type 2        | 2288            | A000044        | Protein kinase, Ser/Thr (non-receptor)  | 10374542       | Mouse          | Balb/C        | Brain+Testis cDNA      | NCBI                          | 6679466                                |
| EF043601                 | Downstream of tyrosine kinase 4, dok4        | 977             | A000053        | Adaptor/scaffold                        | 10627780       | Mouse          | Balb/c        | Brain+Testis cDNA      | NCBI                          | 16716572                               |
| EF043602                 | Pak1                                         | 1631            | A000070        | Protein kinase, Ser/Thr (non-receptor)  | 10627822       | Mouse          | Balb/c        | Brain+Testis cDNA      | NCBI                          | 6754977                                |
| EF043603                 | Growth factor receptor-bound protein 7, GRB7 | 1607            | A000071        | Adaptor/scaffold                        | 10627256       | Mouse          | Balb/c        | Brain+Testis cDNA      | NCBI                          | 6754065                                |
| EF043604                 | Rho GDI                                      | 614             | A000076        | Cytosolic, misc.                        | 10374254       | Mouse          | Balb/C        | Brain+Testis cDNA      | NCBI                          | 12597248                               |
| EF043605                 | Tpl2/Cot                                     | 1403            | A000092        | Protein kinase, Ser/Thr (non-receptor)  | 10373429       | Mouse          | Balb/C        | Brain+Testis cDNA      | NCBI                          | 6678797                                |
| EF043606                 | Rgs16                                        | 605             | A000093        | GTPase activating protein, RGS          | 10627331       | Mouse          | Balb/c        | Brain+Testis cDNA      | NCBI                          | 1911240                                |
| EF043607                 | I kappa B alpha                              | 944             | A000097        | Inhibitor protein                       | 10373479       | Mouse          | Balb/C        | Brain+Testis cDNA      | NCBI                          | 1022733                                |
| EF043608                 | PDE4B3                                       | 2165            | A000105        | Phosphodiesterase                       | 10373480       | Mouse          | Balb/C        | Brain+Testis cDNA      | NCBI                          | 9790150                                |
| EF043609                 | Casein kinase II alpha 2                     | 1052            | A000108        | Protein kinase, Ser/Thr (non-receptor)  | 10373583       | Mouse          | Balb/C        | Brain+Testis cDNA      | NCBI                          | 6753539                                |
| EF043610                 | Casein kinase II alpha 1                     | 1175            | A000109        | Protein kinase, Ser/Thr (non-           | 10373695       | Mouse          | Balb/C        | Brain+Testis cDNA      | NCBI                          | 7106274                                |

| <u>GenBank Accession</u> | <u>Gene Name</u>                        | <u>ORF size</u> | <u>AFCS ID</u> | <u>Protein category</u>                 | <u>ATCC ID</u> | <u>Species</u> | <u>Strain</u> | <u>Source material</u> | <u>Target sequence source</u>                                   | <u>Target sequence ID (Genbank GI)</u> |
|--------------------------|-----------------------------------------|-----------------|----------------|-----------------------------------------|----------------|----------------|---------------|------------------------|-----------------------------------------------------------------|----------------------------------------|
|                          |                                         |                 |                | receptor)                               |                |                |               |                        |                                                                 |                                        |
| EF043611                 | G protein alpha i3                      | 1064            | A000112        | G protein, heterotrimeric               | 10373436       | Mouse          | Balb/C        | Brain+Testis cDNA      | NCBI                                                            | 12835822                               |
| EF043612                 | NCK                                     | 1133            | A000113        | Adaptor/scaffold                        | 10374409       | Mouse          | Balb/C        | Brain+Testis cDNA      | NCBI                                                            | 2811257                                |
| EF043613                 | FKBP 12                                 | 326             | A000115        | Isomerase                               | 10374401       | Mouse          | Balb/C        | Brain+Testis cDNA      | NCBI                                                            | 13435586                               |
| EF043614                 | Wasp                                    | 1562            | A000118        | Adaptor/scaffold                        | 10627284       | Mouse          | Balb/C        | Brain+Testis cDNA      | NCBI                                                            | 6678580                                |
| EF043615                 | GCRa                                    | 3173            | A000119        | Receptor, guanylyl cyclase              | 10627728       | Mouse          | Balb/C        | Brain+Testis cDNA      | NCBI                                                            | 6679113                                |
| EF043616                 | RGS4                                    | 617             | A000134        | GTPase activating protein, RGS          | 10373454       | Mouse          | Balb/C        | Brain+Testis cDNA      | NCBI                                                            | 6677742                                |
| EF043617                 | Beta actin                              | 1127            | A000191        | Cytoskeletal protein                    | 10373495       | Mouse          | Balb/C        | Brain+Testis cDNA      | NCBI                                                            | 49867                                  |
| EF043618                 | ActR2a/ActR2                            | 1541            | A000203        | Receptor, Ser/Thr kinase                | 10627911       | Mouse          | Balb/C        | Brain+Testis cDNA      | NCBI                                                            | 6680631                                |
| EF043619                 | ActR2b                                  | 1538            | A000204        | Receptor, Ser/Thr kinase                | 10627621       | Mouse          | Balb/C        | Brain+Testis cDNA      | NCBI                                                            | 6680633                                |
| EF043620                 | Akt1                                    | 1442            | A000249        | Protein kinase, Ser/Thr (non-receptor)  | 10373600       | Mouse          | Balb/C        | Brain+Testis cDNA      | NCBI                                                            | 200641                                 |
| EF043621                 | AKT                                     | 1442            | A000249        | Protein kinase, Ser/Thr (non-receptor)  | 10373451       | Mouse          | Balb/C        | Brain+Testis cDNA      | NCBI                                                            | 6753033                                |
| EF043622                 | Akt2                                    | 1445            | A000250        | Protein kinase, Ser/Thr (non-receptor)  | 10373576       | Mouse          | Balb/C        | Brain+Testis cDNA      | NCBI                                                            | 6680673                                |
| EF043623                 | Akt3                                    | 1439            | A000251        | Protein kinase, Ser/Thr (non-receptor)  | 10374289       | Mouse          | Balb/C        | Brain+Testis cDNA      | NCBI                                                            | 6753031                                |
| EF043624                 | Alk1                                    | 1508            | A000254        | Receptor, Ser/Thr kinase                | 10627623       | Mouse          | Balb/C        | Brain+Testis cDNA      | NCBI                                                            | 15679967                               |
| EF043625                 | Alk2                                    | 1529            | A000255        | Receptor, Ser/Thr kinase                | 10627624       | Mouse          | Balb/C        | Brain+Testis cDNA      | NCBI                                                            | 6680627                                |
| EF043626                 | Alk3/BMPR1A                             | 1598            | A000256        | Receptor, Ser/Thr kinase                | 10627626       | Mouse          | Balb/C        | Brain+Testis cDNA      | NCBI                                                            | 577633                                 |
| EF043627                 | Alk4                                    | 1517            | A000257        | Receptor, Ser/Thr kinase                | 10627913       | Mouse          | Balb/C        | Brain+Testis cDNA      | NCBI                                                            | 25070246                               |
| EF043628                 | ALK7                                    | 1241            | A000260        | Receptor, Ser/Thr kinase                | 10627938       | Mouse          | Balb/C        | Brain+Testis cDNA      | <a href="http://kinase.com/mouse/">http://kinase.com/mouse/</a> |                                        |
| EF043629                 | AmpKa1                                  | 1376            | A000267        | Protein kinase, Ser/Thr (non-receptor)  | 10627629       | Mouse          | Balb/C        | Brain+Testis cDNA      | NCBI                                                            | 28481367                               |
| EF043630                 | Amp-Pk alpha2/AMPKa2                    | 1658            | A000268        | Protein kinase, Ser/Thr (non-receptor)  | 10627945       | Mouse          | Balb/C        | Brain cDNA             | Celera                                                          | AfCS Assembled                         |
| EF043631                 | MISR2                                   | 1706            | A000283        | Receptor, Ser/Thr kinase                | 10627940       | Mouse          | Balb/C        | Brain+Testis cDNA      | <a href="http://kinase.com/mouse/">http://kinase.com/mouse/</a> |                                        |
| EF043632                 | Cytohesin 2                             | 1202            | A000330        | Guanine nucleotide exchange factor, ARF | 10627255       | Mouse          | Balb/c        | Brain+Testis cDNA      | NCBI                                                            | 3885502                                |
| EF043633                 | Cytohesin 3                             | 1199            | A000332        | Guanine nucleotide exchange factor, ARF | 10627827       | Mouse          | Balb/c        | Brain+Testis cDNA      | NCBI                                                            | 7242194                                |
| EF043634                 | General receptor for phosphoinositide 1 | 605             | A000332        | Guanine nucleotide exchange factor, ARF | 10627808       | Mouse          | Balb/c        | Brain+Testis cDNA      | NCBI                                                            | 13938145                               |
| EF043635                 | Arp3                                    | 1256            | A000335        | Cytoskeletal protein                    | 10627172       | Mouse          | Balb/C        | Brain+Testis cDNA      | NCBI                                                            | 12835801                               |
| EF043636                 | M-Ras                                   | 626             | A000348        | G protein, monomeric (non-Rab)          | 10627233       | Mouse          | Balb/C        | Brain+Testis cDNA      | NCBI                                                            | 2209064                                |
| EF043637                 | Aurora1                                 | 1037            | A000351        | Protein kinase, Ser/Thr (non-receptor)  | 10373680       | Mouse          | Balb/C        | Brain+Testis cDNA      | NCBI                                                            | 2182131                                |
| EF043638                 | Aurora 2                                | 1253            | A000352        | Protein kinase, Ser/Thr (non-receptor)  | 10627171       | Mouse          | Balb/C        | Brain+Testis cDNA      | NCBI                                                            | 2257983                                |

| <u>GenBank Accession</u> | <u>Gene Name</u>                                 | <u>ORF size</u> | <u>AFCS ID</u> | <u>Protein category</u>                     | <u>ATCC ID</u> | <u>Species</u> | <u>Strain</u> | <u>Source material</u> | <u>Target sequence source</u>                                   | <u>Target sequence ID (Genbank GI)</u> |
|--------------------------|--------------------------------------------------|-----------------|----------------|---------------------------------------------|----------------|----------------|---------------|------------------------|-----------------------------------------------------------------|----------------------------------------|
| EF043639                 | Aurora 2                                         | 1187            | A000352        | Protein kinase, Ser/Thr (non-receptor)      | 10374291       | Mouse          | Balb/C        | Brain+Testis cDNA      | NCBI                                                            | 2979620                                |
| EF043640                 | Aur3                                             | 848             | A000353        | Protein kinase, Ser/Thr (non-receptor)      | 10374290       | Mouse          | Balb/C        | Brain+Testis cDNA      | NCBI                                                            | 10181113                               |
| EF043641                 | Bad                                              | 614             | A000358        | Cytosolic, misc.                            | 10627242       | Mouse          | Balb/C        | Brain+Testis cDNA      | NCBI                                                            | 6671609                                |
| EF043642                 | Bam32                                            | 842             | A000361        | Adaptor/scaffold                            | 10627288       | Mouse          | Balb/c        | Brain+Testis cDNA      | NCBI                                                            | 6503079                                |
| EF043643                 | BLNK                                             | 1373            | A000381        | Adaptor/scaffold                            | 10373540       | Mouse          | Balb/C        | Brain+Testis cDNA      | NCBI                                                            | 3406752                                |
| EF043644                 | Calbindin                                        | 785             | A000419        | Calcium-binding protein                     | 10373457       | Mouse          | Balb/C        | Brain+Testis cDNA      | NCBI                                                            | 6753241                                |
| EF043645                 | Calcineurin A alpha subunit                      | 1562            | A000420        | Protein phosphatase, Ser/Thr (non-receptor) | 10627330       | Mouse          | Balb/c        | Brain+Testis cDNA      | NCBI                                                            | 192347                                 |
| EF043646                 | Calcineurin A gamma subunit                      | 1541            | A000422        | Protein phosphatase, Ser/Thr (non-receptor) | 10627318       | Mouse          | Balb/c        | Brain+Testis cDNA      | NCBI                                                            | 6679446                                |
| EF043647                 | Calmodulin1                                      | 446             | A000452        | Calcium-binding protein                     | 10627333       | Mouse          | Balb/c        | Brain+Testis cDNA      | NCBI                                                            | 34328486                               |
| EF043648                 | CaMK1a                                           | 1124            | A000455        | Protein kinase, Ser/Thr (non-receptor)      | 10627633       | Mouse          | Balb/C        | Brain+Testis cDNA      | NCBI                                                            | 19527139                               |
| EF043649                 | Calmodulin-dependent protein kinase II alpha     | 1436            | A000456        | Protein kinase, Ser/Thr (non-receptor)      | 10373597       | Mouse          | Balb/C        | Brain+Testis cDNA      | NCBI                                                            | 50416                                  |
| EF043650                 | Calmodulin-dependent protein kinase II beta      | 1628            | A000457        | Protein kinase, Ser/Thr (non-receptor)      | 10373569       | Mouse          | Balb/C        | Brain+Testis cDNA      | NCBI                                                            | 6671659                                |
| EF043651                 | Calmodulin-dependent protein kinase II delta     | 1538            | A000458        | Protein kinase, Ser/Thr (non-receptor)      | 10374299       | Mouse          | Balb/C        | Brain+Testis cDNA      | NCBI                                                            | 12849627                               |
| EF043652                 | Calmodulin-dependent protein kinase III/EEF2K    | 2174            | A000460        | Protein kinase, Ser/Thr (non-receptor)      | 10627478       | Mouse          | Balb/C        | Brain cDNA             | NCBI                                                            | 6681274                                |
| EF043653                 | CAM kinase IV                                    | 1409            | A000461        | Protein kinase, Ser/Thr (non-receptor)      | 10373658       | Mouse          | Balb/C        | Brain+Testis cDNA      | NCBI                                                            | 6753251                                |
| EF043654                 | Calmodulin-dependent protein kinase kinase alpha | 1517            | A000462        | Protein kinase, Ser/Thr (non-receptor)      | 10627868       | Mouse          | Balb/C        | Brain cDNA             | NCBI                                                            | 9256524                                |
| EF043655                 | CAMKK2                                           | 1511            | A000463        | Protein kinase, Ser/Thr (non-receptor)      | 10627915       | Mouse          | Balb/C        | Brain+Testis cDNA      | NCBI                                                            | 26336680                               |
| EF043656                 | Casein kinase I alpha                            | 977             | A000485        | Protein kinase, Ser/Thr (non-receptor)      | 10627481       | Mouse          | Balb/C        | Brain cDNA             | NCBI                                                            | 18043934                               |
| EF043657                 | Casein kinase I delta                            | 1247            | A000487        | Protein kinase, Ser/Thr (non-receptor)      | 10627483       | Mouse          | Balb/C        | Brain cDNA             | Celera                                                          | AfCS Assembled                         |
| EF043658                 | Casein kinase I epsilon                          | 1250            | A000488        | Protein kinase, Ser/Thr (non-receptor)      | 10627517       | Mouse          | Balb/C        | Brain cDNA             | NCBI                                                            | 7949024                                |
| EF043659                 | CK1g1                                            | 1268            | A000489        | Protein kinase, Ser/Thr (non-receptor)      | 10627916       | Mouse          | Balb/C        | Brain+Testis cDNA      | NCBI                                                            | 27502356                               |
| EF043660                 | CK1g2                                            | 1247            | A000490        | Protein kinase, Ser/Thr (non-receptor)      | 10627929       | Mouse          | Balb/C        | Brain+Testis cDNA      | <a href="http://kinase.com/mouse/">http://kinase.com/mouse/</a> |                                        |
| EF043661                 | Caveolin-1                                       | 536             | A000519        | Adaptor/scaffold                            | 10373490       | Mouse          | Balb/C        | Brain+Testis cDNA      | NCBI                                                            | 603660                                 |
| EF043662                 | Caveolin-3                                       | 455             | A000522        | Adaptor/scaffold                            | 10373505       | Mouse          | Balb/C        | Brain+Testis cDNA      | NCBI                                                            | 6680851                                |
| EF043663                 | Cbl                                              | 2741            | A000525        | Adaptor/scaffold                            | 10627213       | Mouse          | Balb/C        | Spleen cDNA            | NCBI                                                            | 6680857                                |
| EF043664                 | GRP-1                                            | 515             | A000529        | Cytosolic, misc.                            | 10373450       | Mouse          | Balb/C        | Brain+Testis cDNA      | NCBI                                                            | 6680024                                |
| EF043665                 | p70 S6 kinase                                    | 1508            | A000530        | Protein kinase, Ser/Thr (non-receptor)      | 10373485       | Mouse          | Balb/C        | Brain+Testis cDNA      | NCBI                                                            | 23512345                               |

| <u>GenBank Accession</u> | <u>Gene Name</u>          | <u>ORF size</u> | <u>AFCS ID</u> | <u>Protein category</u>                 | <u>ATCC ID</u> | <u>Species</u> | <u>Strain</u> | <u>Source material</u> | <u>Target sequence source</u> | <u>Target sequence ID (Genbank GI)</u> |
|--------------------------|---------------------------|-----------------|----------------|-----------------------------------------|----------------|----------------|---------------|------------------------|-------------------------------|----------------------------------------|
| EF043666                 | p85 S6 kinase             | 1577            | A000530        | Protein kinase, Ser/Thr (non-receptor)  | 10373486       | Mouse          | Balb/C        | Brain+Testis cDNA      | NCBI                          | 23512345                               |
| EF043667                 | CD19                      | 1643            | A000538        | Cell surface, misc.                     | 10374252       | Mouse          | Balb/C        | Brain+Testis cDNA      | NCBI                          | 6753337                                |
| EF043668                 | CD22                      | 2606            | A000542        | Cell surface, misc.                     | 10627793       | Mouse          | Balb/C        | Brain+Testis cDNA      | NCBI                          | 6753339                                |
| EF043669                 | CD32                      | 881             | A000556        | Cell surface, misc.                     | 10627219       | Mouse          | Balb/C        | Spleen cDNA            | NCBI                          | 6857782                                |
| EF043670                 | CD44                      | 2384            | A000566        | Cell surface, misc.                     | 10627165       | Mouse          | Balb/C        | Brain+Testis cDNA      | NCBI                          | 6491803                                |
| EF043671                 | CD79a                     | 662             | A000586        | Immunoglobulin superfamily              | 10374296       | Mouse          | Balb/C        | Brain+Testis cDNA      | NCBI                          | 6680891                                |
| EF043672                 | CD79b                     | 686             | A000587        | Immunoglobulin superfamily              | 10373446       | Mouse          | Balb/C        | Brain+Testis cDNA      | NCBI                          | 6680374                                |
| EF043673                 | CD81                      | 710             | A000591        | Cell surface, misc.                     | 10374298       | Mouse          | Balb/C        | Brain+Testis cDNA      | NCBI                          | 1679982                                |
| EF043674                 | Cdc2 kinase               | 893             | A000604        | Protein kinase, Ser/Thr (non-receptor)  | 10374300       | Mouse          | Balb/C        | Brain+Testis cDNA      | NCBI                          | 192533                                 |
| EF043675                 | Cdk2                      | 1040            | A000606        | Protein kinase, Ser/Thr (non-receptor)  | 10373604       | Mouse          | Balb/C        | Brain+Testis cDNA      | NCBI                          | 2832436                                |
| EF043676                 | Cdk4                      | 911             | A000608        | Protein kinase, Ser/Thr (non-receptor)  | 10374398       | Mouse          | Balb/C        | Brain+Testis cDNA      | NCBI                          | 6753379                                |
| EF043677                 | Cdk5                      | 878             | A000609        | Protein kinase, Ser/Thr (non-receptor)  | 10374302       | Mouse          | Balb/C        | Brain+Testis cDNA      | NCBI                          | 6680907                                |
| EF043678                 | Cdk6                      | 980             | A000610        | Protein kinase, Ser/Thr (non-receptor)  | 10373566       | Mouse          | Balb/C        | Brain+Testis cDNA      | NCBI                          | 5453258                                |
| EF043679                 | Cdk7                      | 1040            | A000611        | Protein kinase, Ser/Thr (non-receptor)  | 10374303       | Mouse          | Balb/C        | Brain+Testis cDNA      | NCBI                          | 562023                                 |
| EF043680                 | Ched                      | 1257            | A000621        | Protein kinase, Ser/Thr (non-receptor)  | 10627515       | Mouse          | Balb/C        | Brain cDNA             | Celera                        | AfCS Assembled                         |
| EF043681                 | Chemokine receptor CXCR4  | 1079            | A000636        | Receptor, GPCR                          | 10627210       | Mouse          | Balb/C        | Spleen cDNA            | NCBI                          | 6753459                                |
| EF043682                 | Chemokine receptor CXCR5  | 1124            | A000637        | Receptor, GPCR                          | 10373433       | Mouse          | Balb/C        | Brain+Testis cDNA      | NCBI                          | 6680789                                |
| EF043683                 | Chk1                      | 1430            | A000642        | Protein kinase, Ser/Thr (non-receptor)  | 10374271       | Mouse          | Balb/C        | Brain+Testis cDNA      | NCBI                          | 2367670                                |
| EF043684                 | Chk2                      | 1640            | A000643        | Protein kinase, Ser/Thr (non-receptor)  | 10374305       | Mouse          | Balb/C        | Brain+Testis cDNA      | NCBI                          | 3982841                                |
| EF043685                 | Stk23                     | 1484            | A000662        | Cytosolic, misc.                        | 10373606       | Mouse          | Balb/C        | Brain+Testis cDNA      | NCBI                          | 3599506                                |
| EF043686                 | Clk1                      | 1448            | A000665        | Protein kinase, dual-specificity        | 10627276       | Mouse          | Balb/C        | Brain+Testis cDNA      | NCBI                          | 50439                                  |
| EF043687                 | Clk2                      | 1499            | A000666        | Protein kinase, dual-specificity        | 10373560       | Mouse          | Balb/C        | Brain+Testis cDNA      | NCBI                          | 2645851                                |
| EF043688                 | Clk3                      | 1472            | A000667        | Protein kinase, dual-specificity        | 10374399       | Mouse          | Balb/C        | Brain+Testis cDNA      | NCBI                          | 2645853                                |
| EF043689                 | Clk4                      | 1442            | A000668        | Protein kinase, dual-specificity        | 10627180       | Mouse          | Balb/C        | Brain+Testis cDNA      | NCBI                          | 2645855                                |
| EF043690                 | Syntrophin basic 2, SNTB2 | 1562            | A000691        | Dystrophin complex                      | 10627781       | Mouse          | Balb/c        | Brain+Testis cDNA      | NCBI                          | 6678058                                |
| EF043691                 | Csk                       | 1352            | A000701        | Protein kinase, tyrosine (non-receptor) | 10373430       | Mouse          | Balb/C        | Brain+Testis cDNA      | NCBI                          | 6681052                                |
| EF043692                 | DAGk-alpha                | 2192            | A000764        | Kinase, lipid                           | 10373523       | Mouse          | Balb/C        | Brain+Testis cDNA      | NCBI                          | 3493665                                |
| EF043693                 | DAGk-beta                 | 2387            | A000765        | Kinase, lipid                           | 10374400       | Mouse          | Balb/C        | Brain+Testis cDNA      | Celera                        | AfCS Assembled                         |
| EF043694                 | Drak2                     | 1118            | A000791        | Protein kinase, Ser/Thr (non-receptor)  | 10373642       | Mouse          | Balb/C        | Brain+Testis cDNA      | NCBI                          | 13879223                               |

| <u>GenBank Accession</u> | <u>Gene Name</u>                  | <u>ORF size</u> | <u>AFCs ID</u> | <u>Protein category</u>                     | <u>ATCC ID</u> | <u>Species</u> | <u>Strain</u> | <u>Source material</u>   | <u>Target sequence source</u> | <u>Target sequence ID (Genbank GI)</u> |
|--------------------------|-----------------------------------|-----------------|----------------|---------------------------------------------|----------------|----------------|---------------|--------------------------|-------------------------------|----------------------------------------|
| EF043695                 | Prkr/Pkr                          | 1547            | A000792        | Protein kinase, Ser/Thr                     | 10627501       | Mouse          | Balb/C        | Brain cDNA               | NCBI                          | 6755159                                |
| EF043696                 | Dyrk2                             | 1580            | A000798        | Protein kinase, dual-specificity            | 10627485       | Mouse          | Balb/C        | Brain cDNA               | Celera                        | AfCS Assembled                         |
| EF043697                 | Dyrk3                             | 1760            | A000799        | Protein kinase, dual-specificity            | 10373644       | Mouse          | Balb/C        | Brain+Testis cDNA        | NCBI                          | 13879450                               |
| EF043698                 | Pak5                              | 2159            | A000829        | Protein kinase, Ser/Thr (non-receptor)      | 10627872       | Mouse          | Balb/C        | Brain cDNA               | Celera                        | AfCS Assembled                         |
| EF043699                 | Erk1                              | 1139            | A000874        | Protein kinase, Ser/Thr (non-receptor)      | 10374308       | Mouse          | Balb/C        | Brain+Testis cDNA        | NCBI                          | 50858                                  |
| EF043700                 | Erk2                              | 1070            | A000875        | Protein kinase, Ser/Thr (non-receptor)      | 10373674       | Mouse          | Balb/C        | Brain+Testis cDNA        | NCBI                          | 6754631                                |
| EF043701                 | Erk5                              | 2213            | A000879        | Protein kinase, Ser/Thr (non-receptor)      | 10374272       | Mouse          | Balb/C        | Brain+Testis cDNA        | NCBI                          | 5081464                                |
| EF043702                 | Erk5                              | 2420            | A000879        | Protein kinase, Ser/Thr (non-receptor)      | 10374310       | Mouse          | Balb/C        | Brain+Testis cDNA        | NCBI                          | 5360520                                |
| EF043703                 | Ezrin                             | 1760            | A000892        | Cytoskeletal protein                        | 10373459       | Mouse          | Balb/C        | Brain+Testis cDNA        | NCBI                          | 50880                                  |
| EF043704                 | FAK                               | 3206            | A000900        | Protein kinase, tyrosine (non-receptor)     | 10373470       | Mouse          | Balb/C        | Brain+Testis cDNA        | NCBI                          | 193223                                 |
| EF043705                 | faciogenital dysplasia protein 1A | 2882            | A000912        | Guanine nucleotide exchange factor, Rac/Rho | 10627308       | Mouse          | Balb/c        | Brain+Testis cDNA        | NCBI                          | 6679774                                |
| EF043706                 | faciogenital dysplasia protein 1B | 1193            | A000912        | Guanine nucleotide exchange factor, Rac/Rho | 10627259       | Mouse          | Balb/c        | Brain+Testis cDNA        | NCBI                          | 15079253                               |
| EF043707                 | Fkhr2                             | 2015            | A000945        | Transcription factor                        | 10627228       | Mouse          | Balb/C        | Brain+Testis cDNA        | NCBI                          | 5348331                                |
| EF043708                 | Fyn                               | 1613            | A000969        | Protein kinase, tyrosine (non-receptor)     | 10627192       | Mouse          | Balb/C        | Brain+Testis cDNA        | NCBI                          | 193357                                 |
| EF043709                 | Galpha11                          | 1079            | A000970        | G protein, heterotrimeric                   | 10373483       | Mouse          | Balb/C        | Brain+Testis cDNA        | NCBI                          | 6754003                                |
| EF043710                 | Galpha i1                         | 1064            | A000974        | G protein, heterotrimeric                   | 10373455       | Mouse          | Balb/C        | Brain+Testis cDNA        | Celera                        | AfCS Assembled                         |
| EF043711                 | Galpha i2                         | 1067            | A000975        | G protein, heterotrimeric                   | 10373488       | Mouse          | Balb/C        | Brain+Testis cDNA        | NCBI                          | 6680036                                |
| EF043712                 | G protein alpha q                 | 1079            | A000978        | G protein, heterotrimeric                   | 10373544       | Mouse          | Balb/C        | Brain+Testis cDNA        | NCBI                          | 6680038                                |
| EF043713                 | G protein beta 1                  | 1022            | A000982        | G protein, heterotrimeric                   | 10373440       | Mouse          | Balb/C        | Brain+Testis cDNA        | NCBI                          | 6680044                                |
| EF043714                 | G protein beta 2                  | 1022            | A000983        | G protein, heterotrimeric                   | 10373438       | Mouse          | Balb/C        | Brain+Testis cDNA        | NCBI                          | 13937390                               |
| EF043715                 | G protein beta 3                  | 1022            | A000984        | G protein, heterotrimeric                   | 10373443       | Mouse          | Balb/C        | Brain+Testis cDNA        | NCBI                          | 11138000                               |
| EF043716                 | G protein beta 4                  | 1022            | A000985        | G protein, heterotrimeric                   | 10373441       | Mouse          | Balb/C        | Brain+Testis cDNA        | NCBI                          | 7305090                                |
| EF043717                 | G protein gamma 10                | 206             | A000987        | G protein, heterotrimeric                   | 10627223       | Mouse          | Balb/C        | Brain+Testis+Spleen cDNA | NCBI                          | 12851842                               |
| EF043718                 | G protein gamma 11                | 221             | A000988        | G protein, heterotrimeric                   | 10627236       | Mouse          | Balb/C        | Brain+Testis cDNA        | Celera                        | AfCS assembled                         |
| EF043719                 | G protein gamma 2                 | 215             | A000991        | G protein, heterotrimeric                   | 10627252       | Mouse          | Balb/c        | Brain+Testis cDNA        | NCBI                          | 6754019                                |
| EF043720                 | G protein gamma 3                 | 227             | A000992        | G protein, heterotrimeric                   | 10627250       | Mouse          | Balb/c        | Brain+Testis cDNA        | NCBI                          | 6754021                                |
| EF043721                 | G protein gamma 4                 | 227             | A000993        | G protein, heterotrimeric                   | 10627251       | Mouse          | Balb/c        | Brain+Testis cDNA        | NCBI                          | 6754023                                |
| EF043722                 | G protein gamma 5                 | 206             | A000994        | G protein, heterotrimeric                   | 10627238       | Mouse          | Balb/C        | Spleen cDNA              | NCBI                          | 12805664                               |
| EF043723                 | G protein gamma 7                 | 206             | A000995        | G protein, heterotrimeric                   | 10627247       | Mouse          | Balb/C        | Brain+Testis cDNA        | Celera                        | AfCS assembled                         |

| <u>GenBank Accession</u> | <u>Gene Name</u>                       | <u>ORF size</u> | <u>AFCS ID</u> | <u>Protein category</u>                | <u>ATCC ID</u> | <u>Species</u> | <u>Strain</u> | <u>Source material</u> | <u>Target sequence source</u>                                   | <u>Target sequence ID (Genbank GI)</u> |
|--------------------------|----------------------------------------|-----------------|----------------|----------------------------------------|----------------|----------------|---------------|------------------------|-----------------------------------------------------------------|----------------------------------------|
| EF043724                 | G protein gamma 8                      | 212             | A000996        | G protein, heterotrimeric              | 10627246       | Mouse          | Balb/C        | Spleen cDNA            | NCBI                                                            | 6164868                                |
| EF043725                 | Gads                                   | 968             | A001021        | Adaptor/scaffold                       | 10627196       | Mouse          | Balb/C        | Brain+Testis cDNA      | NCBI                                                            | 3387866                                |
| EF043726                 | Ras GTPase-activating protein 3, RASA3 | 2504            | A001026        | GTPase activating protein, Ras         | 10627328       | Mouse          | Balb/c        | Spleen cDNA            | NCBI                                                            | 7110712                                |
| EF043727                 | Germinal center kinase/GCK             | 2465            | A001037        | Protein kinase, Ser/Thr (non-receptor) | 10374260       | Mouse          | Balb/C        | Brain+Testis cDNA      | NCBI                                                            | 6678799                                |
| EF043728                 | Emk/MARK2                              | 2168            | A001086        | Protein kinase, Ser/Thr (non-receptor) | 10627201       | Mouse          | Balb/C        | Brain+Testis cDNA      | NCBI                                                            | 6679642                                |
| EF043729                 | Grb2                                   | 653             | A001088        | Adaptor/scaffold                       | 10374242       | Mouse          | Balb/C        | Brain+Testis cDNA      | NCBI                                                            | 6680082                                |
| EF043730                 | Grk2                                   | 2069            | A001094        | Protein kinase, Ser/Thr (non-receptor) | 10373594       | Mouse          | Balb/C        | Brain+Testis cDNA      | NCBI                                                            | 13398447                               |
| EF043731                 | Grk5                                   | 1772            | A001097        | Protein kinase, Ser/Thr (non-receptor) | 10373701       | Mouse          | Balb/C        | Brain+Testis cDNA      | NCBI                                                            | 3005010                                |
| EF043732                 | Grk6                                   | 1730            | A001098        | Protein kinase, Ser/Thr (non-receptor) | 10373682       | Mouse          | Balb/C        | Brain+Testis cDNA      | NCBI                                                            | 3319972                                |
| EF043733                 | Gsk3 beta                              | 1262            | A001106        | Protein kinase, Ser/Thr (non-receptor) | 10373592       | Mouse          | Balb/C        | Brain+Testis cDNA      | NCBI                                                            | 9790076                                |
| EF043734                 | Pak6                                   | 2048            | A001114        | Protein kinase, Ser/Thr (non-receptor) | 10627498       | Mouse          | Balb/C        | Brain cDNA             | Celera                                                          | AfCS Assembled                         |
| EF043735                 | Hipk1                                  | 2159            | A001122        | Protein kinase, Ser/Thr (non-receptor) | 10373694       | Mouse          | Balb/C        | Brain+Testis cDNA      | NCBI                                                            | 5305332                                |
| EF043736                 | HIPK2                                  | 3506            | A001123        | Protein kinase, Ser/Thr (non-receptor) | 10627187       | Mouse          | Balb/C        | Brain+Testis cDNA      | NCBI                                                            | 12751414                               |
| EF043737                 | Hpk1                                   | 2483            | A001144        | Protein kinase, Ser/Thr (non-receptor) | 10627278       | Mouse          | Balb/C        | Brain+Testis cDNA      | NCBI                                                            | 1654011                                |
| EF043738                 | Hri                                    | 1859            | A001145        | Protein kinase, Ser/Thr (non-receptor) | 10627512       | Mouse          | Balb/C        | Brain cDNA             | NCBI                                                            | 7305014                                |
| EF043739                 | IkappaB-beta                           | 1079            | A001166        | Inhibitor protein                      | 10374253       | Mouse          | Balb/C        | Brain+Testis cDNA      | NCBI                                                            | 699496                                 |
| EF043740                 | IkappaB-gamma                          | 1823            | A001168        | Inhibitor protein                      | 10627229       | Mouse          | Balb/C        | Brain+Testis cDNA      | NCBI                                                            | 247616                                 |
| EF043741                 | IKKalpha                               | 2237            | A001170        | Protein kinase, Ser/Thr (non-receptor) | 10627232       | Mouse          | Balb/C        | Brain+Testis cDNA      | NCBI                                                            | 6680941                                |
| EF043742                 | IKKbeta                                | 2216            | A001172        | Protein kinase, Ser/Thr (non-receptor) | 10627799       | Mouse          | Balb/C        | Brain+Testis cDNA      | NCBI                                                            | 5814088                                |
| EF043743                 | Ikk                                    | 1358            | A001173        | Protein kinase, Ser/Thr (non-receptor) | 10627487       | Mouse          | Balb/C        | Brain cDNA             | NCBI                                                            | 6754341                                |
| EF043744                 | Inositol 4-phosphatase type I          | 2768            | A001185        | Phosphatase (non-protein)              | 10627290       | Mouse          | Balb/c        | Brain+Testis cDNA      | NCBI                                                            | 11875783                               |
| EF043745                 | In(5)-phos type II                     | 2330            | A001188        | Phosphatase (non-protein)              | 10373521       | Mouse          | Balb/C        | Brain+Testis cDNA      | NCBI                                                            | 9945301                                |
| EF043746                 | Integrin alpha 4                       | 3098            | A001203        | Adhesin/agglutinin                     | 10627244       | Mouse          | Balb/C        | Brain+Testis cDNA      | NCBI                                                            | 7110656                                |
| EF043747                 | Integrin beta 7                        | 2420            | A001218        | Adhesin/agglutinin                     | 10627239       | Mouse          | Balb/C        | Brain+Testis cDNA      | NCBI                                                            | 7305192                                |
| EF043748                 | Integrin beta 1                        | 2396            | A001220        | Adhesin/agglutinin                     | 10627190       | Mouse          | Balb/C        | Brain+Testis cDNA      | NCBI                                                            | 52721                                  |
| EF043749                 | Irak1                                  | 2036            | A001277        | Protein kinase, Ser/Thr (non-receptor) | 10627765       | Mouse          | Balb/C        | Brain+Testis cDNA      | NCBI                                                            | 6680418                                |
| EF043750                 | IRAK2                                  | 1868            | A001278        | Protein kinase, Ser/Thr (non-receptor) | 10627749       | Mouse          | Balb/C        | Brain+Testis cDNA      | <a href="http://kinase.com/mouse/">http://kinase.com/mouse/</a> |                                        |



| <u>GenBank Accession</u> | <u>Gene Name</u>                  | <u>ORF size</u> | <u>AFCS ID</u> | <u>Protein category</u>                     | <u>ATCC ID</u> | <u>Species</u> | <u>Strain</u> | <u>Source material</u> | <u>Target sequence source</u> | <u>Target sequence ID (Genbank GI)</u> |
|--------------------------|-----------------------------------|-----------------|----------------|---------------------------------------------|----------------|----------------|---------------|------------------------|-------------------------------|----------------------------------------|
| EF043751                 | JAK1                              | 3461            | A001290        | Protein kinase, tyrosine (non-receptor)     | 10373473       | Mouse          | Balb/C        | Brain+Testis cDNA      | NCBI                          | 399694                                 |
| EF043752                 | Jip2                              | 2492            | A001294        | Inhibitor protein                           | 10627802       | Mouse          | Balb/C        | Brain+Testis cDNA      | NCBI                          | 11139691                               |
| EF043753                 | Jip3                              | 1853            | A001295        | Inhibitor protein                           | 10374314       | Mouse          | Balb/C        | Brain+Testis cDNA      | NCBI                          | 5051880                                |
| EF043754                 | Jnk1                              | 1154            | A001296        | Protein kinase, Ser/Thr (non-receptor)      | 10373662       | Mouse          | Balb/C        | Brain+Testis cDNA      | NCBI                          | 6141550                                |
| EF043755                 | Jnk2                              | 1271            | A001297        | Protein kinase, Ser/Thr (non-receptor)      | 10374315       | Mouse          | Balb/C        | Brain+Testis cDNA      | NCBI                          | 4558392                                |
| EF043756                 | Jnk3                              | 1268            | A001298        | Protein kinase, Ser/Thr (non-receptor)      | 10373649       | Mouse          | Balb/C        | Brain+Testis cDNA      | NCBI                          | 529433                                 |
| EF043757                 | Kkialre/CDKL1                     | 1058            | A001345        | Protein kinase, Ser/Thr (non-receptor)      | 10627490       | Mouse          | Balb/C        | Brain cDNA             | Celera                        | AfCS Assembled                         |
| EF043758                 | Stk4/MST1                         | 1463            | A001348        | Protein kinase, Ser/Thr (non-receptor)      | 10627776       | Mouse          | Balb/C        | Brain cDNA             | NCBI                          | 12328813                               |
| EF043759                 | Ksr1                              | 2621            | A001349        | Adaptor/scaffold                            | 10627492       | Mouse          | Balb/C        | Brain cDNA             | NCBI                          | 7305214                                |
| EF043760                 | Lck                               | 1529            | A001394        | Protein kinase, tyrosine (non-receptor)     | 10627216       | Mouse          | Balb/C        | Spleen cDNA            | NCBI                          | 198763                                 |
| EF043761                 | Lymphoid blast crisis-like 1, Lfc | 1721            | A001404        | Guanine nucleotide exchange factor, Rac/Rho | 10627810       | Mouse          | Balb/c        | Brain+Testis cDNA      | NCBI                          | 902022                                 |
| EF043762                 | Lfc                               | 2957            | A001404        | Guanine nucleotide exchange factor, Rac/Rho | 10627828       | Mouse          | Balb/c        | Brain+Testis cDNA      | NCBI                          | 5917695                                |
| EF043763                 | Limk2                             | 1916            | A001408        | Protein kinase, Ser/Thr (non-receptor)      | 10627513       | Mouse          | Balb/C        | Brain cDNA             | NCBI                          | 2801408                                |
| EF043764                 | Lnk                               | 1643            | A001413        | Adaptor/scaffold                            | 10627806       | Mouse          | Balb/c        | Brain+Testis cDNA      | NCBI                          | 6678705                                |
| EF043765                 | Stk10/Lok                         | 2900            | A001414        | Protein kinase, Ser/Thr (non-receptor)      | 10627301       | Mouse          | Balb/c        | Brain+Testis cDNA      | NCBI                          | 2723474                                |
| EF043766                 | PA-phosphatase                    | 854             | A001416        | Phosphatase (non-protein)                   | 10373527       | Mouse          | Balb/C        | Brain+Testis cDNA      | NCBI                          | 1487872                                |
| EF043767                 | Lyn                               | 1538            | A001441        | Protein kinase, tyrosine (non-receptor)     | 10373539       | Mouse          | Balb/C        | Brain+Testis cDNA      | NCBI                          | 198940                                 |
| EF043768                 | Mapkap kinase 3                   | 1154            | A001455        | Protein kinase, Ser/Thr (non-receptor)      | 10627871       | Mouse          | Balb/C        | Brain cDNA             | Celera                        | AfCS Assembled                         |
| EF043769                 | Mask/MST4                         | 1250            | A001457        | Protein kinase, Ser/Thr (non-receptor)      | 10373640       | Mouse          | Balb/C        | Brain+Testis cDNA      | NCBI                          | 13543060                               |
| EF043770                 | Mek1                              | 1181            | A001505        | Protein kinase, dual-specificity            | 10373672       | Mouse          | Balb/C        | Brain+Testis cDNA      | NCBI                          | 6678793                                |
| EF043771                 | Mek2                              | 1205            | A001506        | Protein kinase, dual-specificity            | 10373664       | Mouse          | Balb/C        | Brain+Testis cDNA      | NCBI                          | 545202                                 |
| EF043772                 | Mek3                              | 944             | A001507        | Protein kinase, dual-specificity            | 10374318       | Mouse          | Balb/C        | Brain+Testis cDNA      | NCBI                          | 1771302                                |
| EF043773                 | Mek3                              | 1043            | A001507        | Protein kinase, dual-specificity            | 10373633       | Mouse          | Balb/C        | Brain+Testis cDNA      | NCBI                          | 12846828                               |
| EF043774                 | Mek4                              | 1190            | A001508        | Protein kinase, dual-specificity            | 10627176       | Mouse          | Balb/C        | Brain+Testis cDNA      | NCBI                          | 1754530                                |
| EF043775                 | Mek5                              | 1346            | A001509        | Protein kinase, dual-specificity            | 10374250       | Mouse          | Balb/C        | Brain+Testis cDNA      | NCBI                          | 6754623                                |
| EF043776                 | Mek6                              | 1004            | A001510        | Protein kinase, dual-specificity            | 10627199       | Mouse          | Balb/C        | Brain+Testis cDNA      | NCBI                          | 1495701                                |
| EF043777                 | Mek7                              | 1175            | A001511        | Protein kinase, dual-specificity            | 10627787       | Mouse          | Balb/C        | Brain+Testis cDNA      | NCBI                          | 2462788                                |
| EF043778                 | Mek7                              | 1040            | A001511        | Protein kinase, dual-specificity            | 10373681       | Mouse          | Balb/C        | Brain+Testis cDNA      | NCBI                          | 2462788                                |
| EF043779                 | Mek7                              | 1406            | A001511        | Protein kinase, dual-specificity            | 10627184       | Mouse          | Balb/C        | Brain+Testis cDNA      | NCBI                          | 2789435                                |

| <u>GenBank Accession</u> | <u>Gene Name</u>                                             | <u>ORF size</u> | <u>AFCS ID</u> | <u>Protein category</u>                     | <u>ATCC ID</u> | <u>Species</u> | <u>Strain</u> | <u>Source material</u> | <u>Target sequence source</u> | <u>Target sequence ID (Genbank GI)</u> |
|--------------------------|--------------------------------------------------------------|-----------------|----------------|---------------------------------------------|----------------|----------------|---------------|------------------------|-------------------------------|----------------------------------------|
| EF043780                 | Mek7                                                         | 1358            | A001511        | Protein kinase, dual-specificity            | 10374321       | Mouse          | Balb/C        | Brain+Testis cDNA      | NCBI                          | 4321767                                |
| EF043781                 | Mek7                                                         | 1259            | A001511        | Protein kinase, dual-specificity            | 10373686       | Mouse          | Balb/C        | Brain+Testis cDNA      | NCBI                          | 4321769                                |
| EF043782                 | Mek7                                                         | 1139            | A001511        | Protein kinase, dual-specificity            | 10373688       | Mouse          | Balb/C        | Brain+Testis cDNA      | NCBI                          | 4321771                                |
| EF043783                 | Mek7                                                         | 1358            | A001511        | Protein kinase, dual-specificity            | 10374322       | Mouse          | Balb/C        | Brain+Testis cDNA      | NCBI                          | 4321771                                |
| EF043784                 | Mekk2                                                        | 1859            | A001513        | Protein kinase, Ser/Thr (non-receptor)      | 10627302       | Mouse          | Balb/c        | Brain+Testis cDNA      | NCBI                          | 6754627                                |
| EF043785                 | Mekk3                                                        | 1880            | A001514        | Protein kinase, Ser/Thr (non-receptor)      | 10627182       | Mouse          | Balb/C        | Brain+Testis cDNA      | NCBI                          | 1223901                                |
| EF043786                 | MLK1                                                         | 1826            | A001549        | Protein kinase, Ser/Thr (non-receptor)      | 10627730       | Mouse          | Balb/C        | Brain+Testis cDNA      | NCBI                          | 26343790                               |
| EF043787                 | MLK2                                                         | 2303            | A001550        | Protein kinase, Ser/Thr (non-receptor)      | 10627731       | Mouse          | Balb/C        | Brain+Testis cDNA      | NCBI                          | 28477843                               |
| EF043788                 | MLK2                                                         | 2303            | A001550        | Protein kinase, Ser/Thr (non-receptor)      | 10627935       | Mouse          | Balb/C        | Brain+Testis cDNA      | NCBI                          | 28477843                               |
| EF043789                 | Mlk3                                                         | 2552            | A001551        | Protein kinase, Ser/Thr (non-receptor)      | 10627944       | Mouse          | Balb/C        | Brain cDNA             | NCBI                          | 11528493                               |
| EF043790                 | Mnk1                                                         | 1247            | A001554        | Protein kinase, Ser/Thr (non-receptor)      | 10373556       | Mouse          | Balb/C        | Brain+Testis cDNA      | NCBI                          | 1929058                                |
| EF043791                 | Mnk2                                                         | 1238            | A001555        | Protein kinase, Ser/Thr (non-receptor)      | 10374408       | Mouse          | Balb/C        | Brain+Testis cDNA      | NCBI                          | 1929060                                |
| EF043792                 | Msk2                                                         | 2321            | A001563        | Protein kinase, Ser/Thr (non-receptor)      | 10374323       | Mouse          | Balb/C        | Brain+Testis cDNA      | NCBI                          | 9910453                                |
| EF043793                 | T2k/TBK1                                                     | 2189            | A001597        | Protein kinase, Ser/Thr (non-receptor)      | 10627877       | Mouse          | Balb/C        | Brain cDNA             | NCBI                          | 4960037                                |
| EF043794                 | NAK/TBK1                                                     | 2189            | A001597        | Protein kinase, Ser/Thr (non-receptor)      | 10627769       | Mouse          | Balb/C        | Brain+Testis cDNA      | Celera                        | AfCS Assembled                         |
| EF043795                 | Nek2                                                         | 1331            | A001625        | Protein kinase, dual-specificity            | 10374325       | Mouse          | Balb/C        | Brain+Testis cDNA      | NCBI                          | 6754817                                |
| EF043796                 | Nek3                                                         | 1529            | A001626        | Protein kinase, dual-specificity            | 10373690       | Mouse          | Balb/C        | Brain+Testis cDNA      | NCBI                          | 4454838                                |
| EF043797                 | Nek4                                                         | 2231            | A001627        | Protein kinase, dual-specificity            | 10627788       | Mouse          | Balb/C        | Brain+Testis cDNA      | NCBI                          | 2879821                                |
| EF043798                 | Nek4                                                         | 2378            | A001627        | Protein kinase, dual-specificity            | 10373668       | Mouse          | Balb/C        | Brain+Testis cDNA      | NCBI                          | 4323325                                |
| EF043799                 | Neuroepithelial cell transforming gene 1, Net1 guanine nucle | 1625            | A001630        | Guanine nucleotide exchange factor, Rac/Rho | 10627826       | Mouse          | Balb/c        | Brain+Testis cDNA      | NCBI                          | 13435656                               |
| EF043800                 | NFkappaB p65                                                 | 1649            | A001645        | Transcription factor                        | 10627191       | Mouse          | Balb/C        | Brain+Testis cDNA      | NCBI                          | 6677708                                |
| EF043801                 | Map4k4/NIK                                                   | 3440            | A001653        | Protein kinase, Ser/Thr (non-receptor)      | 10627819       | Mouse          | Balb/c        | Brain+Testis cDNA      | NCBI                          | 1872545                                |
| EF043802                 | NO synthase 3                                                | 3608            | A001660        | Oxidoreductase                              | 10373462       | Mouse          | Balb/C        | Brain+Testis cDNA      | NCBI                          | 6679089                                |
| EF043803                 | NLK                                                          | 1547            | A001668        | Protein kinase, Ser/Thr (non-receptor)      | 10373571       | Mouse          | Balb/C        | Brain+Testis cDNA      | NCBI                          | 6679071                                |
| EF043804                 | p38 alpha Map kinase                                         | 1082            | A001717        | Protein kinase, Ser/Thr (non-receptor)      | 10374424       | Mouse          | Balb/C        | Brain+Testis cDNA      | NCBI                          | 10092598                               |
| EF043805                 | p38 delta Map kinase                                         | 1100            | A001719        | Protein kinase, Ser/Thr (non-receptor)      | 10373666       | Mouse          | Balb/C        | Brain+Testis cDNA      | NCBI                          | 4099017                                |
| EF043806                 | p38 gamma Map kinase                                         | 1100            | A001720        | Protein kinase, Ser/Thr (non-receptor)      | 10627185       | Mouse          | Balb/C        | Brain+Testis cDNA      | NCBI                          | 7305252                                |

| <u>GenBank Accession</u> | <u>Gene Name</u>                                             | <u>ORF size</u> | <u>AFCS ID</u> | <u>Protein category</u>                | <u>ATCC ID</u> | <u>Species</u> | <u>Strain</u> | <u>Source material</u> | <u>Target sequence source</u> | <u>Target sequence ID (Genbank GI)</u> |
|--------------------------|--------------------------------------------------------------|-----------------|----------------|----------------------------------------|----------------|----------------|---------------|------------------------|-------------------------------|----------------------------------------|
| EF043807                 | Paf receptor                                                 | 1025            | A001728        | Receptor, GPCR                         | 10627298       | Mouse          | Balb/C        | Plasmid template       | NCBI                          | 1256924                                |
| EF043808                 | Pak3                                                         | 1634            | A001729        | Protein kinase, Ser/Thr (non-receptor) | 10373554       | Mouse          | Balb/C        | Brain+Testis cDNA      | NCBI                          | 1079713                                |
| EF043809                 | Pak4                                                         | 1781            | A001730        | Protein kinase, Ser/Thr (non-receptor) | 10627495       | Mouse          | Balb/C        | Brain cDNA             | Celera                        | AfCS Assembled                         |
| EF043810                 | PCTAIRE1                                                     | 1490            | A001737        | Protein kinase, Ser/Thr (non-receptor) | 10374262       | Mouse          | Balb/C        | Brain+Testis cDNA      | NCBI                          | 53610                                  |
| EF043811                 | PCTAIRE2                                                     | 1571            | A001738        | Protein kinase, Ser/Thr (non-receptor) | 10627500       | Mouse          | Balb/C        | Brain cDNA             | Celera                        | AfCS Assembled                         |
| EF043812                 | PCTAIRE3                                                     | 1355            | A001739        | Protein kinase, Ser/Thr (non-receptor) | 10373551       | Mouse          | Balb/C        | Brain+Testis cDNA      | NCBI                          | 53612                                  |
| EF043813                 | Pdpk1/PDK1                                                   | 1679            | A001740        | Protein kinase, Ser/Thr (non-receptor) | 10373692       | Mouse          | Balb/C        | Brain+Testis cDNA      | NCBI                          | 5052327                                |
| EF043814                 | PI-TP alpha                                                  | 815             | A001744        | Transporter, facilitator               | 10373514       | Mouse          | Balb/C        | Brain+Testis cDNA      | NCBI                          | 2121247                                |
| EF043815                 | PI-TP beta                                                   | 815             | A001745        | Transporter, facilitator               | 10373516       | Mouse          | Balb/C        | Brain+Testis cDNA      | NCBI                          | 9790158                                |
| EF043816                 | Phosphoinositide 3-kinase p101 class Ib regulatory subunit   | 2615            | A001767        | Kinase, lipid                          | 10627816       | Mouse          | Balb/C        | Spleen cDNA            | Celera                        | AfCS assembled                         |
| EF043817                 | PI3K-p110alpha                                               | 3206            | A001768        | Kinase, lipid                          | 10373550       | Mouse          | Balb/C        | Brain+Testis cDNA      | NCBI                          | 6679316                                |
| EF043818                 | Phosphoinositide 3-kinase p110 beta, class Ia catalytic subu | 3194            | A001769        | Kinase, lipid                          | 10627194       | Mouse          | Balb/C        | Brain+Testis cDNA      | Celera                        | AfCS assembled                         |
| EF043819                 | PI3K-p110delta                                               | 3134            | A001770        | Kinase, lipid                          | 10374329       | Mouse          | Balb/C        | Brain+Testis cDNA      | NCBI                          | 6679318                                |
| EF043820                 | PI3K-p110delta                                               | 3143            | A001770        | Kinase, lipid                          | 10374330       | Mouse          | Balb/C        | Brain+Testis cDNA      | NCBI                          | 6679318                                |
| EF043821                 | PI3K-p110gamma                                               | 3308            | A001771        | Kinase, lipid                          | 10374413       | Mouse          | Balb/C        | Brain+Testis cDNA      | NCBI                          | 11890407                               |
| EF043822                 | Phosphoinositide 3-kinase p50 alpha regulatory subunit       | 1274            | A001772        | Kinase, lipid                          | 10627230       | Mouse          | Balb/C        | Brain+Testis cDNA      | Celera                        | AfCS assembled                         |
| EF043823                 | Phosphoinositide 3-kinase p55 gamma regulatory subunit       | 1385            | A001774        | Kinase, lipid                          | 10627195       | Mouse          | Balb/C        | Brain+Testis cDNA      | NCBI                          | 1050992                                |
| EF043824                 | Phosphoinositide 3-kinase p85 alpha regulatory subunit       | 2174            | A001775        | Kinase, lipid                          | 10373425       | Mouse          | Balb/C        | Brain+Testis cDNA      | NCBI                          | 200211                                 |
| EF043825                 | PI3K-p85beta                                                 | 2168            | A001776        | Kinase, lipid                          | 10373513       | Mouse          | Balb/C        | Brain+Testis cDNA      | NCBI                          | 2181944                                |
| EF043826                 | Phosphoinositide 4-kinase type III alpha (230K)              | 3119            | A001777        | Kinase, lipid                          | 10627286       | Mouse          | Balb/c        | Spleen cDNA            | Celera                        | AfCS assembled                         |
| EF043827                 | Phosphoinositide 4-kinase type III beta                      | 2450            | A001778        | Kinase, lipid                          | 10627289       | Mouse          | Balb/c        | Brain+Testis cDNA      | Celera                        | AfCS assembled                         |
| EF043828                 | PI(4)P5-K alpha                                              | 1619            | A001780        | Kinase, lipid                          | 10374327       | Mouse          | Balb/C        | Brain+Testis cDNA      | NCBI                          | 6679328                                |
| EF043829                 | PI(4)P5-K beta                                               | 1643            | A001781        | Kinase, lipid                          | 10373519       | Mouse          | Balb/C        | Brain+Testis cDNA      | NCBI                          | 6679330                                |
| EF043830                 | PI(4)P5-K gamma                                              | 1985            | A001782        | Kinase, lipid                          | 10374208       | Mouse          | Balb/C        | Brain+Testis cDNA      | NCBI                          | 6679322                                |
| EF043831                 | Phosphoinositide 5-phosphate 4-kinase type II-alpha          | 1217            | A001783        | Kinase, lipid                          | 10627796       | Mouse          | Balb/C        | Spleen cDNA            | NCBI                          | 6679324                                |
| EF043832                 | Phosphoinositide 5-phosphate 4-kinase type II-beta           | 1112            | A001784        | Kinase, lipid                          | 10627234       | Mouse          | Balb/C        | Brain+Testis cDNA      | Celera                        | AfCS assembled                         |
| EF043833                 | Phosphoinositide 5-phosphate 4-kinase type II-gamma          | 1265            | A001785        | Kinase, lipid                          | 10374333       | Mouse          | Balb/C        | Brain+Testis cDNA      | NCBI                          | 17298685                               |
| EF043834                 | PLA2-II-c                                                    | 452             | A001790        | Phospholipase                          | 10373529       | Mouse          | Balb/C        | Brain+Testis cDNA      | NCBI                          | 6679366                                |

| <u>GenBank Accession</u> | <u>Gene Name</u>                                 | <u>ORF size</u> | <u>AFCS ID</u> | <u>Protein category</u>                | <u>ATCC ID</u> | <u>Species</u> | <u>Strain</u> | <u>Source material</u> | <u>Target sequence source</u> | <u>Target sequence ID (Genbank GI)</u> |
|--------------------------|--------------------------------------------------|-----------------|----------------|----------------------------------------|----------------|----------------|---------------|------------------------|-------------------------------|----------------------------------------|
| EF043835                 | Phospholipase A2 group V                         | 410             | A001798        | Phospholipase                          | 10627334       | Mouse          | Balb/c        | Brain+Testis cDNA      | NCBI                          | 34328181                               |
| EF043836                 | PLA2-VI-a                                        | 2258            | A001801        | Phospholipase                          | 10374209       | Mouse          | Balb/C        | Brain+Testis cDNA      | NCBI                          | 6842054                                |
| EF043837                 | Phospholipase C-beta1                            | 3521            | A001803        | Phospholipase                          | 10627226       | Mouse          | Balb/C        | Brain+Testis cDNA      | NCBI                          | 9845288                                |
| EF043838                 | PLC-delta1                                       | 2270            | A001807        | Phospholipase                          | 10373580       | Mouse          | Balb/C        | Brain+Testis cDNA      | NCBI                          | 4894787                                |
| EF043839                 | Phospholipase C-gamma1                           | 3872            | A001809        | Phospholipase                          | 10627224       | Mouse          | Balb/C        | Brain+Testis cDNA      | Celera                        | AfCS assembled                         |
| EF043840                 | PLD-2                                            | 2801            | A001812        | Phospholipase                          | 10373549       | Mouse          | Balb/C        | Brain+Testis cDNA      | NCBI                          | 6679378                                |
| EF043841                 | Phosphorylase kinase gamma, testis subunit/Phkg2 | 1220            | A001816        | Protein kinase, Ser/Thr (non-receptor) | 10373632       | Mouse          | Balb/C        | Brain+Testis cDNA      | NCBI                          | 12837720                               |
| EF043842                 | Pim1                                             | 941             | A001822        | Protein kinase, Ser/Thr (non-receptor) | 10373591       | Mouse          | Balb/C        | Brain+Testis cDNA      | NCBI                          | 9506972                                |
| EF043843                 | Pim2                                             | 935             | A001823        | Protein kinase, Ser/Thr (non-receptor) | 10374415       | Mouse          | Balb/C        | Brain+Testis cDNA      | NCBI                          | 765065                                 |
| EF043844                 | Pim3                                             | 980             | A001824        | Protein kinase, Ser/Thr (non-receptor) | 10627777       | Mouse          | Balb/C        | Brain cDNA             | Celera                        | AfCS Assembled                         |
| EF043845                 | Plk-1                                            | 1811            | A001847        | Protein kinase, Ser/Thr (non-receptor) | 10373645       | Mouse          | Balb/C        | Brain+Testis cDNA      | NCBI                          | 13905175                               |
| EF043846                 | Plk-2                                            | 2048            | A001848        | Protein kinase, Ser/Thr (non-receptor) | 10374211       | Mouse          | Balb/C        | Brain+Testis cDNA      | NCBI                          | 200999                                 |
| EF043847                 | PRAK/MAPKAP5                                     | 1415            | A001892        | Protein kinase, Ser/Thr (non-receptor) | 10627169       | Mouse          | Balb/C        | Brain+Testis cDNA      | NCBI                          | 2911812                                |
| EF043848                 | Prk2                                             | 2234            | A001897        | Protein kinase, Ser/Thr (non-receptor) | 10627734       | Mouse          | Balb/C        | Brain+Testis cDNA      | NCBI                          | 25060554                               |
| EF043849                 | PKA Calpha                                       | 1055            | A001914        | Protein kinase, Ser/Thr (non-receptor) | 10374213       | Mouse          | Balb/C        | Brain+Testis cDNA      | NCBI                          | 7110692                                |
| EF043850                 | Protein kinase A catalytic subunit beta          | 1055            | A001915        | Protein kinase, Ser/Thr (non-receptor) | 10373586       | Mouse          | Balb/C        | Brain+Testis cDNA      | NCBI                          | 6755075                                |
| EF043851                 | PKA RIalpha                                      | 1208            | A001918        | Protein kinase, Ser/Thr (non-receptor) | 10373464       | Mouse          | Balb/C        | Brain+Testis cDNA      | NCBI                          | 200356                                 |
| EF043852                 | Protein kinase C alpha                           | 2018            | A001919        | Protein kinase, Ser/Thr (non-receptor) | 10374543       | Mouse          | Balb/C        | Brain+Testis cDNA      | NCBI                          | 200362                                 |
| EF043853                 | Protein kinase C beta2                           | 2021            | A001921        | Protein kinase, Ser/Thr (non-receptor) | 10374261       | Mouse          | Balb/C        | Brain+Testis cDNA      | NCBI                          | 6679344                                |
| EF043854                 | Protein kinase C delta1                          | 2024            | A001922        | Protein kinase, Ser/Thr (non-receptor) | 10627784       | Mouse          | Balb/C        | Brain+Testis cDNA      | NCBI                          | 4115529                                |
| EF043855                 | Protein kinase C epsilon                         | 2213            | A001925        | Protein kinase, Ser/Thr (non-receptor) | 10627200       | Mouse          | Balb/C        | Brain+Testis cDNA      | NCBI                          | 6755083                                |
| EF043856                 | Protein kinase C eta                             | 2051            | A001926        | Protein kinase, Ser/Thr (non-receptor) | 10627279       | Mouse          | Balb/C        | Brain+Testis cDNA      | NCBI                          | 6679346                                |
| EF043857                 | Protein kinase C gamma1                          | 2093            | A001927        | Protein kinase, Ser/Thr (non-receptor) | 10373588       | Mouse          | Balb/C        | Brain+Testis cDNA      | NCBI                          | 6755079                                |
| EF043858                 | Protein kinase C lambda                          | 1760            | A001929        | Protein kinase, Ser/Thr (non-receptor) | 10373574       | Mouse          | Balb/C        | Brain+Testis cDNA      | NCBI                          | 6679348                                |
| EF043859                 | Protein kinase C mu1                             | 2756            | A001930        | Protein kinase, Ser/Thr (non-receptor) | 10627329       | Mouse          | Balb/c        | Brain+Testis cDNA      | NCBI                          | 6679350                                |
| EF043860                 | Protein kinase C zeta                            | 1778            | A001934        | Protein kinase, Ser/Thr (non-receptor) | 10627173       | Mouse          | Balb/C        | Brain+Testis cDNA      | NCBI                          | 6679354                                |

| <u>GenBank Accession</u> | <u>Gene Name</u>                                           | <u>ORF size</u> | <u>AFCS ID</u> | <u>Protein category</u>                      | <u>ATCC ID</u> | <u>Species</u> | <u>Strain</u> | <u>Source material</u> | <u>Target sequence source</u> | <u>Target sequence ID (Genbank GI)</u> |
|--------------------------|------------------------------------------------------------|-----------------|----------------|----------------------------------------------|----------------|----------------|---------------|------------------------|-------------------------------|----------------------------------------|
| EF043861                 | PKC-zeta                                                   | 1778            | A001934        | Protein kinase, Ser/Thr (non-receptor)       | 10373661       | Mouse          | Balb/C        | Brain+Testis cDNA      | NCBI                          | 6679354                                |
| EF043862                 | PTEN                                                       | 1211            | A001941        | Phosphatase, lipid                           | 10373526       | Mouse          | Balb/C        | Brain+Testis cDNA      | NCBI                          | 6679522                                |
| EF043863                 | Rac1                                                       | 578             | A002001        | G protein, monomeric (non-Rab)               | 10374416       | Mouse          | Balb/C        | Brain+Testis cDNA      | NCBI                          | 53885                                  |
| EF043864                 | Rac3                                                       | 578             | A002003        | G protein, monomeric (non-Rab)               | 10373448       | Mouse          | Balb/C        | Brain+Testis cDNA      | NCBI                          | 13516843                               |
| EF043865                 | Raf1                                                       | 1946            | A002008        | Protein kinase, Ser/Thr (non-receptor)       | 10627874       | Mouse          | Balb/C        | Brain cDNA             | NCBI                          | 18497289                               |
| EF043866                 | RAS guanine nucleotide releasing factor GRF beta, Rasgrf1B | 536             | A002032        | Guanine nucleotide exchange factor, Ras      | 10627274       | Mouse          | Balb/c        | Brain+Testis cDNA      | NCBI                          | 5917695                                |
| EF043867                 | Rgs1                                                       | 590             | A002040        | GTPase activating protein, RGS               | 10627332       | Mouse          | Balb/c        | Spleen cDNA            | NCBI                          | 7657511                                |
| EF043868                 | RhoA                                                       | 581             | A002062        | G protein, monomeric (non-Rab)               | 10373510       | Mouse          | Balb/C        | Brain+Testis cDNA      | NCBI                          | 5815441                                |
| EF043869                 | RhoB                                                       | 590             | A002064        | G protein, monomeric (non-Rab)               | 10374337       | Mouse          | Balb/C        | Brain+Testis cDNA      | NCBI                          | 1491740                                |
| EF043870                 | RhoC                                                       | 581             | A002065        | G protein, monomeric (non-Rab)               | 10374338       | Mouse          | Balb/C        | Brain+Testis cDNA      | NCBI                          | 6680727                                |
| EF043871                 | Human RhoC                                                 | 581             | A002065        | G protein, monomeric (non-Rab)               | 10373547       | Human          | Balb/C        | Brain+Testis cDNA      | NCBI                          | 407698                                 |
| EF043872                 | RIPK2                                                      | 1619            | A002083        | Protein kinase, Ser/Thr (non-receptor)       | 10627503       | Mouse          | Balb/C        | Brain cDNA             | Celera                        | AfCS Assembled                         |
| EF043873                 | Rsk1                                                       | 2207            | A002099        | Protein kinase, Ser/Thr (non-receptor)       | 10627277       | Mouse          | Balb/C        | Brain+Testis cDNA      | NCBI                          | 556321                                 |
| EF043874                 | Rsk2                                                       | 1457            | A002100        | Protein kinase, Ser/Thr (non-receptor)       | 10627186       | Mouse          | Balb/C        | Brain+Testis cDNA      | NCBI                          | 10946893                               |
| EF043875                 | Rsk 3                                                      | 2201            | A002101        | Protein kinase, Ser/Thr (non-receptor)       | 10374417       | Mouse          | Balb/C        | Brain+Testis cDNA      | NCBI                          | 6755373                                |
| EF043876                 | Sgk/Sgk1                                                   | 1295            | A002148        | Protein kinase, Ser/Thr (non-receptor)       | 10373589       | Mouse          | Balb/C        | Brain+Testis cDNA      | NCBI                          | 6755489                                |
| EF043877                 | Sh2-B ph domain containing signaling mediator 1, Sh2-B     | 2012            | A002149        | Adaptor/scaffold                             | 10627817       | Mouse          | Balb/c        | Brain+Testis cDNA      | NCBI                          | 3493523                                |
| EF043878                 | SHP-2                                                      | 1793            | A002157        | Protein phosphatase, tyrosine (non-receptor) | 10627801       | Mouse          | Balb/C        | Brain+Testis cDNA      | NCBI                          | 6755227                                |
| EF043879                 | SHP-2                                                      | 1781            | A002157        | Protein phosphatase, tyrosine (non-receptor) | 10627815       | Mouse          | Balb/C        | Brain+Testis cDNA      | NCBI                          | 6755227                                |
| EF043880                 | SRC-associated adaptor protein, SCAP2                      | 1076            | A002165        | Adaptor/scaffold                             | 10627818       | Mouse          | Balb/c        | Brain+Testis cDNA      | NCBI                          | 13277601                               |
| EF043881                 | Smad2                                                      | 1403            | A002174        | Transcription; coactivator/corepressor       | 10374419       | Mouse          | Balb/C        | Brain+Testis cDNA      | NCBI                          | 6754605                                |
| EF043882                 | Somatostatin R                                             | 1175            | A002204        | Receptor, GPCR                               | 10373533       | Mouse          | Balb/C        | Brain+Testis cDNA      | NCBI                          | 6678036                                |
| EF043883                 | Stat3                                                      | 2312            | A002232        | Transcription factor                         | 10373478       | Mouse          | Balb/C        | Brain+Testis cDNA      | NCBI                          | 458705                                 |
| EF043884                 | Syntrophin, Beta1, SNTB1                                   | 1613            | A002246        | Dystrophin complex                           | 10627322       | Mouse          | Balb/c        | Brain+Testis cDNA      | NCBI                          | 7710095                                |
| EF043885                 | TGFbR1                                                     | 1511            | A002272        | Receptor, misc.                              | 10627671       | Mouse          | Balb/C        | Brain+Testis cDNA      | NCBI                          | 6678322                                |
| EF043886                 | TGFbR2                                                     | 1703            | A002273        | Receptor, Ser/Thr kinase                     | 10627924       | Mouse          | Balb/C        | Brain+Testis cDNA      | NCBI                          | 27363475                               |
| EF043887                 | TOR                                                        | 1550            | A002302        | Receptor, nuclear (transcription factor)     | 10627215       | Mouse          | Balb/C        | Brain+Testis cDNA      | NCBI                          | 1145628                                |
| EF043888                 | Trad                                                       | 2018            | A002305        | Protein kinase, Ser/Thr (non-receptor)       | 10627737       | Mouse          | Balb/C        | Brain+Testis cDNA      | NCBI                          | 26353809                               |

| <u>GenBank Accession</u> | <u>Gene Name</u>    | <u>ORF size</u> | <u>AFCS ID</u> | <u>Protein category</u>                     | <u>ATCC ID</u> | <u>Species</u> | <u>Strain</u> | <u>Source material</u> | <u>Target sequence source</u>                                   | <u>Target sequence ID (Genbank GI)</u> |
|--------------------------|---------------------|-----------------|----------------|---------------------------------------------|----------------|----------------|---------------|------------------------|-----------------------------------------------------------------|----------------------------------------|
| EF043889                 | Trad                | 701             | A002305        | Protein kinase, Ser/Thr (non-receptor)      | 10627674       | Mouse          | Balb/C        | Brain+Testis cDNA      | NCBI                                                            | 28493858                               |
| EF043890                 | Alpha1 tubulin      | 1355            | A002335        | Cytoskeletal protein                        | 10374256       | Mouse          | Balb/C        | Brain+Testis cDNA      | NCBI                                                            | 202207                                 |
| EF043891                 | Gamma tubulin       | 1355            | A002344        | Cytoskeletal protein                        | 10373492       | Mouse          | Balb/C        | Brain+Testis cDNA      | NCBI                                                            | 13879227                               |
| EF043892                 | Vav2                | 2519            | A002361        | Guanine nucleotide exchange factor, Rac/Rho | 10627214       | Mouse          | Balb/C        | Brain+Testis cDNA      | NCBI                                                            | 6678554                                |
| EF043893                 | Vav3                | 2543            | A002362        | Guanine nucleotide exchange factor, Rac/Rho | 10627206       | Mouse          | Balb/C        | Brain+Testis cDNA      | NCBI                                                            | 10048435                               |
| EF043894                 | Vimentin            | 1400            | A002365        | Cytoskeletal protein                        | 10373494       | Mouse          | Balb/C        | Brain+Testis cDNA      | NCBI                                                            | 6755974                                |
| EF043895                 | Zip/Dapk3           | 1346            | A002398        | Protein kinase, Ser/Thr (non-receptor)      | 10373562       | Mouse          | Balb/C        | Brain+Testis cDNA      | NCBI                                                            | 2911153                                |
| EF043896                 | Dyrk4               | 1898            | A002403        | Protein kinase, dual-specificity            | 10627645       | Mouse          | Balb/C        | Brain+Testis cDNA      | NCBI                                                            | 26345939                               |
| EF043897                 | Fused               | 1715            | A002406        | Protein kinase, Ser/Thr (non-receptor)      | 10627933       | Mouse          | Balb/C        | Brain+Testis cDNA      | NCBI                                                            | 28479131                               |
| EF043898                 | PDHK1               | 1226            | A002493        | Kinase (non-protein)                        | 10627710       | Mouse          | Balb/C        | Brain+Testis cDNA      | <a href="http://kinase.com/mouse/">http://kinase.com/mouse/</a> |                                        |
| EF043899                 | PDHK2               | 1223            | A002494        | Kinase (non-protein)                        | 10627753       | Mouse          | Balb/C        | Brain+Testis cDNA      | <a href="http://kinase.com/mouse/">http://kinase.com/mouse/</a> |                                        |
| EF043900                 | PDHK3               | 1247            | A002495        | Kinase (non-protein)                        | 10627941       | Mouse          | Balb/C        | Brain+Testis cDNA      | <a href="http://kinase.com/mouse/">http://kinase.com/mouse/</a> |                                        |
| EF043901                 | Slc6a3              | 1859            | A002761        | Transporter, facilitator                    | 10373541       | Mouse          | Balb/C        | Brain+Testis cDNA      | NCBI                                                            | 6753605                                |
| EF043902                 | Slc6a4              | 1892            | A002762        | Transporter, facilitator                    | 10373543       | Mouse          | Balb/C        | Brain+Testis cDNA      | NCBI                                                            | 7110638                                |
| EF043903                 | Fast kinase         | 1535            | A002827        | Protein kinase, Ser/Thr (non-receptor)      | 10627775       | Mouse          | Balb/C        | Brain cDNA             | NCBI                                                            | 12963588                               |
| EF043904                 | Syntrophin, gamma 1 | 728             | A002866        | Dystrophin complex                          | 10627312       | Mouse          | Balb/c        | Brain+Testis cDNA      | NCBI                                                            | 12855919                               |
| EF043905                 | FKBP 51             | 1370            | A002917        | Cytosolic, misc.                            | 10374311       | Mouse          | Balb/C        | Brain+Testis cDNA      | NCBI                                                            | 6753883                                |
| EF043906                 | Stk24/MST3          | 1295            | A002992        | Protein kinase, Ser/Thr (non-receptor)      | 10627179       | Mouse          | Balb/C        | Brain+Testis cDNA      | NCBI                                                            | 13435545                               |
| EF043907                 | Ptpns1              | 1637            | A002993        | Adaptor/scaffold                            | 10627208       | Mouse          | Balb/C        | Brain+Testis cDNA      | NCBI                                                            | 6671639                                |
| EF043908                 | Prkx                | 1067            | A002999        | Protein kinase, Ser/Thr (non-receptor)      | 10374336       | Mouse          | Balb/C        | Brain+Testis cDNA      | NCBI                                                            | 13905165                               |
| EF043909                 | A6/Twinfilin-1      | 1052            | A003000        | Protein kinase, dual-specificity            | 10627926       | Mouse          | Balb/C        | Brain+Testis cDNA      | <a href="http://kinase.com/mouse/">http://kinase.com/mouse/</a> |                                        |
| EF043910                 | BCKDK               | 1238            | A003001        | Enzyme, misc.                               | 10627690       | Mouse          | Balb/C        | Brain+Testis cDNA      | <a href="http://kinase.com/mouse/">http://kinase.com/mouse/</a> |                                        |
| EF043911                 | Melk                | 1928            | A003002        | Protein kinase, Ser/Thr (non-receptor)      | 10627282       | Mouse          | Balb/C        | Brain+Testis cDNA      | NCBI                                                            | 12848359                               |
| EF043912                 | Cask                | 2690            | A003003        | Protein kinase, Ser/Thr (non-receptor)      | 10627303       | Mouse          | Balb/c        | Brain+Testis cDNA      | NCBI                                                            | 6753275                                |
| EF043913                 | Snf1lk/Msk1         | 2339            | A003005        | Protein kinase, Ser/Thr (non-receptor)      | 10373567       | Mouse          | Balb/C        | Brain+Testis cDNA      | NCBI                                                            | 6137751                                |
| EF043914                 | Mark1               | 2387            | A003006        | Protein kinase, Ser/Thr (non-receptor)      | 10627648       | Mouse          | Balb/C        | Brain+Testis cDNA      | NCBI                                                            | 21704013                               |
| EF043915                 | Ccrk                | 1040            | A003008        | Protein kinase, Ser/Thr (non-receptor)      | 10373622       | Mouse          | Balb/C        | Brain+Testis cDNA      | NCBI                                                            | 9664925                                |

| <u>GenBank Accession</u> | <u>Gene Name</u> | <u>ORF size</u> | <u>AFCs ID</u> | <u>Protein category</u>                     | <u>ATCC ID</u> | <u>Species</u> | <u>Strain</u> | <u>Source material</u> | <u>Target sequence source</u> | <u>Target sequence ID (Genbank GI)</u> |
|--------------------------|------------------|-----------------|----------------|---------------------------------------------|----------------|----------------|---------------|------------------------|-------------------------------|----------------------------------------|
| EF043916                 | Dcamk1           | 1301            | A003011        | Protein kinase, Ser/Thr (non-receptor)      | 10373613       | Mouse          | Balb/C        | Brain+Testis cDNA      | NCBI                          | 6716521                                |
| EF043917                 | Mark3            | 2231            | A003012        | Protein kinase, Ser/Thr (non-receptor)      | 10627304       | Mouse          | Balb/c        | Brain+Testis cDNA      | NCBI                          | 12313874                               |
| EF043918                 | Tesk2            | 1712            | A003015        | Protein kinase, Ser/Thr (non-receptor)      | 10627510       | Mouse          | Balb/C        | Brain cDNA             | Celera                        | AfCS Assembled                         |
| EF043919                 | Prp4             | 1490            | A003016        | Protein kinase, Ser/Thr (non-receptor)      | 10373679       | Mouse          | Balb/C        | Brain+Testis cDNA      | NCBI                          | 1399463                                |
| EF043920                 | Kist             | 1244            | A003017        | Protein kinase, Ser/Thr (non-receptor)      | 10627489       | Mouse          | Balb/C        | Brain cDNA             | NCBI                          | 6754447                                |
| EF043921                 | Stk11/Lkb1       | 1310            | A003018        | Protein kinase, Ser/Thr (non-receptor)      | 10373609       | Mouse          | Balb/C        | Brain+Testis cDNA      | NCBI                          | 4589403                                |
| EF043922                 | Tik2             | 1448            | A003022        | Protein kinase, Ser/Thr (non-receptor)      | 10373602       | Mouse          | Balb/C        | Brain+Testis cDNA      | NCBI                          | 1572490                                |
| EF043923                 | Tik2             | 2150            | A003022        | Protein kinase, Ser/Thr (non-receptor)      | 10627203       | Mouse          | Balb/C        | Brain+Testis cDNA      | NCBI                          | 6755804                                |
| EF043924                 | Ulk2             | 3113            | A003024        | Protein kinase, Ser/Thr (non-receptor)      | 10627820       | Mouse          | Balb/C        | Brain+Testis cDNA      | NCBI                          | 7305610                                |
| EF043925                 | Virk2/Vrk2       | 1511            | A003026        | Protein kinase, Ser/Thr (non-receptor)      | 10627681       | Mouse          | Balb/C        | Brain+Testis cDNA      | NCBI                          | 24899246                               |
| EF043926                 | MPSK1            | 821             | A003028        | Protein phosphatase, Ser/Thr (non-receptor) | 10627650       | Mouse          | Balb/C        | Brain+Testis cDNA      | NCBI                          | 6755677                                |
| EF043927                 | MPSK1            | 917             | A003028        | Protein phosphatase, Ser/Thr (non-receptor) | 10627919       | Mouse          | Balb/C        | Brain+Testis cDNA      | NCBI                          | 6755677                                |
| EF043928                 | Nek6             | 941             | A003029        | Protein kinase, Ser/Thr (non-receptor)      | 10373699       | Mouse          | Balb/C        | Brain+Testis cDNA      | NCBI                          | 11037793                               |
| EF043929                 | Nek6             | 920             | A003029        | Protein kinase, Ser/Thr (non-receptor)      | 10373700       | Mouse          | Balb/C        | Brain+Testis cDNA      | NCBI                          | 12836480                               |
| EF043930                 | Nek8             | 875             | A003030        | Protein kinase, Ser/Thr (non-receptor)      | 10374326       | Mouse          | Balb/C        | Brain+Testis cDNA      | NCBI                          | 12852470                               |
| EF043931                 | Stk25/YSK1       | 1280            | A003032        | Protein kinase, Ser/Thr (non-receptor)      | 10627175       | Mouse          | Balb/C        | Brain+Testis cDNA      | NCBI                          | 10946969                               |
| EF043932                 | Stk39/STLK3      | 1670            | A003034        | Protein kinase, Ser/Thr (non-receptor)      | 10374341       | Mouse          | Balb/C        | Brain+Testis cDNA      | NCBI                          | 8394346                                |
| EF043933                 | Sgk2             | 1103            | A003046        | Protein kinase, Ser/Thr (non-receptor)      | 10373620       | Mouse          | Balb/C        | Brain+Testis cDNA      | NCBI                          | 7305482                                |
| EF043934                 | Sgk3             | 1490            | A003047        | Protein kinase, Ser/Thr (non-receptor)      | 10373627       | Mouse          | Balb/C        | Brain+Testis cDNA      | NCBI                          | 11321320                               |
| EF043935                 | Cdkl2            | 1706            | A003125        | Protein kinase, Ser/Thr (non-receptor)      | 10374547       | Mouse          | Balb/C        | Brain+Testis cDNA      | NCBI                          | 8393079                                |
| EF043936                 | Pf1k1/PFTAIRE1   | 1409            | A003126        | Protein kinase, Ser/Thr (non-receptor)      | 10373614       | Mouse          | Balb/C        | Brain+Testis cDNA      | NCBI                          | 6755043                                |
| EF043937                 | Cdk9             | 1115            | A003128        | Protein kinase, Ser/Thr (non-receptor)      | 10627204       | Mouse          | Balb/C        | Brain+Testis cDNA      | NCBI                          | 13278103                               |
| EF043938                 | Kiaa0936/ICK     | 1889            | A003129        | Protein kinase, Ser/Thr (non-receptor)      | 10374407       | Mouse          | Balb/C        | Brain+Testis cDNA      | NCBI                          | 9910287                                |
| EF043939                 | Rage/MOK         | 1262            | A003130        | Protein kinase, Ser/Thr (non-receptor)      | 10373616       | Mouse          | Balb/C        | Brain+Testis cDNA      | NCBI                          | 7106390                                |

| <u>GenBank Accession</u> | <u>Gene Name</u>                                   | <u>ORF size</u> | <u>AFCS ID</u> | <u>Protein category</u>                      | <u>ATCC ID</u> | <u>Species</u> | <u>Strain</u> | <u>Source material</u> | <u>Target sequence source</u> | <u>Target sequence ID (Genbank GI)</u> |
|--------------------------|----------------------------------------------------|-----------------|----------------|----------------------------------------------|----------------|----------------|---------------|------------------------|-------------------------------|----------------------------------------|
| EF043940                 | Bike                                               | 3416            | A003150        | Protein kinase, Ser/Thr (non-receptor)       | 10627772       | Mouse          | Balb/C        | Brain+Testis cDNA      | NCBI                          | 18129621                               |
| EF043941                 | Stk22a/TSSK1                                       | 1097            | A003173        | Protein kinase, Ser/Thr (non-receptor)       | 10627786       | Mouse          | Balb/C        | Brain+Testis cDNA      | NCBI                          | 6678164                                |
| EF043942                 | Stk22b/TSSK2                                       | 1076            | A003174        | Protein kinase, Ser/Thr (non-receptor)       | 10374420       | Mouse          | Balb/C        | Brain+Testis cDNA      | NCBI                          | 6678166                                |
| EF043943                 | Stk22c/TSSK3                                       | 806             | A003175        | Protein kinase, Ser/Thr (non-receptor)       | 10373639       | Mouse          | Balb/C        | Brain+Testis cDNA      | NCBI                          | 12860200                               |
| EF043944                 | SRPK-1                                             | 1946            | A003232        | Protein kinase, Ser/Thr                      | 10627504       | Mouse          | Balb/C        | Brain cDNA             | NCBI                          | 7949138                                |
| EF043945                 | SRPK-2                                             | 2045            | A003233        | Protein kinase, Ser/Thr                      | 10627506       | Mouse          | Balb/C        | Brain cDNA             | NCBI                          | 6678134                                |
| EF043946                 | Pleckstrin, PLEK                                   | 1052            | A003310        | Lipid binding protein                        | 10627265       | Mouse          | Balb/c        | Brain+Testis cDNA      | NCBI                          | 11464970                               |
| EF043947                 | Pleckstrin 2, PLEK2                                | 1058            | A003311        | Lipid binding protein                        | 10627275       | Mouse          | Balb/c        | Brain+Testis cDNA      | NCBI                          | 7305392                                |
| EF043948                 | SSTK                                               | 821             | A003426        | Protein kinase, Ser/Thr                      | 10373646       | Mouse          | Balb/C        | Brain+Testis cDNA      | NCBI                          | 14030780                               |
| EF043949                 | CAMK1g                                             | 1433            | A003427        | Protein kinase, Ser/Thr                      | 10374212       | Mouse          | Balb/C        | Brain+Testis cDNA      | NCBI                          | 14422218                               |
| EF043950                 | NEK7                                               | 908             | A003428        | Protein kinase, Ser/Thr                      | 10373625       | Mouse          | Balb/C        | Brain+Testis cDNA      | NCBI                          | 11037791                               |
| EF043951                 | Large tumor suppressor 2; LATS                     | 3128            | A003429        | Protein kinase, Ser/Thr                      | 10627792       | Mouse          | Balb/C        | Brain+Testis cDNA      | NCBI                          | 7657294                                |
| EF043952                 | DAPK2                                              | 1112            | A003430        | Protein kinase, Ser/Thr                      | 10373611       | Mouse          | Balb/C        | Brain+Testis cDNA      | NCBI                          | 6521216                                |
| EF043953                 | Testes Specific Serine kinase; Tssk4               | 1016            | A003432        | Protein kinase, Ser/Thr                      | 10373637       | Mouse          | Balb/C        | Brain+Testis cDNA      | NCBI                          | 12855864                               |
| EF043954                 | SNARK/Nuak2                                        | 1895            | A003433        | Protein kinase, Ser/Thr                      | 10373629       | Mouse          | Balb/C        | Brain+Testis cDNA      | NCBI                          | 12836134                               |
| EF043955                 | IRAK4                                              | 1379            | A003450        | Protein phosphatase, tyrosine (non-receptor) | 10627647       | Mouse          | Balb/C        | Brain+Testis cDNA      | NCBI                          | 20219011                               |
| EF043956                 | NRBP1                                              | 1607            | A003451        | Protein kinase, Ser/Thr (non-receptor)       | 10627653       | Mouse          | Balb/C        | Brain+Testis cDNA      | NCBI                          | 22219433                               |
| EF043957                 | PSKH1                                              | 1274            | A003452        | Protein phosphatase, Ser/Thr (non-receptor)  | 10627921       | Mouse          | Balb/C        | Brain+Testis cDNA      | NCBI                          | 27734115                               |
| EF043958                 | AB1 SH3-domain binding protein 2                   | 1679            | A003454        | Adaptor/scaffold                             | 10627321       | Mouse          | Balb/c        | Spleen cDNA            | NCBI                          | 6755495                                |
| EF043959                 | Rho guanine nucleotide exchange factor (GEF) 3     | 1574            | A003459        | Guanine nucleotide exchange factor, Rac/Rho  | 10627823       | Mouse          | Balb/c        | Brain+Testis cDNA      | NCBI                          | 13529619                               |
| EF043960                 | oxysterol binding protein-like 5                   | 2621            | A003461        | Cytosolic, misc.                             | 10627821       | Mouse          | Balb/c        | Brain+Testis cDNA      | NCBI                          | 15011888                               |
| EF043961                 | Ethanol decreased 4                                | 1295            | A003462        | Cytosolic, misc.                             | 10627311       | Mouse          | Balb/c        | Brain+Testis cDNA      | NCBI                          | 16716344                               |
| EF043962                 | Neuronal guanine nucleotide exchange factor (Ngef) | 1664            | A003465        | Guanine nucleotide exchange factor, Rac/Rho  | 10627824       | Mouse          | Balb/c        | Brain+Testis cDNA      | NCBI                          | 9845276                                |
| EF043963                 | Unnamed PH and FYVE domain containing protein      | 839             | A003468        | Cytosolic, misc.                             | 10627807       | Mouse          | Balb/c        | Brain+Testis cDNA      | NCBI                          | 12805306                               |
| EF043964                 | A Novel PH domain protein gene                     | 761             | A003470        | Cytosolic, misc.                             | 10627297       | Mouse          | Balb/c        | Brain+Testis cDNA      | NCBI                          | 12850731                               |
| EF043965                 | A Novel PH domain protein gene                     | 785             | A003471        | Cytosolic, misc.                             | 10627271       | Mouse          | Balb/c        | Brain+Testis cDNA      | NCBI                          | 12847946                               |
| EF043966                 | Guanine nucleotide releasing protein x             | 494             | A003472        | Guanine nucleotide exchange factor, misc.    | 10627310       | Mouse          | Balb/c        | Brain+Testis cDNA      | NCBI                          | 13542720                               |
| EF043967                 | A Novel PH domain protein gene                     | 1082            | A003473        | Cytosolic, misc.                             | 10627272       | Mouse          | Balb/c        | Brain+Testis cDNA      | NCBI                          | 12857685                               |
| EF043968                 | TNF intracellular domain-interacting protein       | 1226            | A003474        | Adaptor/scaffold                             | 10627314       | Mouse          | Balb/c        | Brain+Testis cDNA      | NCBI                          | 12963636                               |



| <u>GenBank Accession</u> | <u>Gene Name</u>                                               | <u>ORF size</u> | <u>AFCS ID</u> | <u>Protein category</u>                     | <u>ATCC ID</u> | <u>Species</u> | <u>Strain</u> | <u>Source material</u> | <u>Target sequence source</u> | <u>Target sequence ID (Genbank GI)</u> |
|--------------------------|----------------------------------------------------------------|-----------------|----------------|---------------------------------------------|----------------|----------------|---------------|------------------------|-------------------------------|----------------------------------------|
| EF043969                 | PH domain containing protein, family B, Evec tin 2 or Plekhhb2 | 662             | A003475        | Adaptor/scaffold                            | 10627267       | Mouse          | Balb/c        | Brain+Testis cDNA      | NCBI                          | 6013424                                |
| EF043970                 | CaMK1d                                                         | 1157            | A003478        | Protein kinase, Ser/Thr (non-receptor)      | 10627634       | Mouse          | Balb/C        | Brain+Testis cDNA      | NCBI                          | 28893480                               |
| EF043971                 | CLIK1L                                                         | 1025            | A003479        | Protein kinase, tyrosine (non-receptor)     | 10627642       | Mouse          | Balb/C        | Brain+Testis cDNA      | NCBI                          | 22122688                               |
| EF043972                 | PBK                                                            | 992             | A003481        | Protein kinase, tyrosine (non-receptor)     | 10627656       | Mouse          | Balb/C        | Brain+Testis cDNA      | NCBI                          | 18043225                               |
| EF043973                 | PRPK                                                           | 734             | A003482        | Protein kinase, Ser/Thr (non-receptor)      | 10627920       | Mouse          | Balb/C        | Brain+Testis cDNA      | NCBI                          | 12963836                               |
| EF043974                 | PRPK                                                           | 734             | A003482        | Protein kinase, Ser/Thr (non-receptor)      | 10627658       | Mouse          | Balb/C        | Brain+Testis cDNA      | NCBI                          | 12963836                               |
| EF043975                 | SBK                                                            | 1253            | A003484        | Protein kinase, Ser/Thr (non-receptor)      | 10627664       | Mouse          | Balb/C        | Brain+Testis cDNA      | NCBI                          | 21704179                               |
| EF043976                 | STLK6                                                          | 1256            | A003486        | Protein phosphatase, Ser/Thr (non-receptor) | 10627669       | Mouse          | Balb/C        | Brain+Testis cDNA      | NCBI                          | 27477054                               |
| EF043977                 | VACAMKL                                                        | 1532            | A003488        | Protein kinase, Ser/Thr (non-receptor)      | 10627679       | Mouse          | Balb/C        | Brain+Testis cDNA      | NCBI                          | 21704241                               |
| EF043978                 | YANK1                                                          | 1196            | A003489        | Protein kinase, Ser/Thr (non-receptor)      | 10627683       | Mouse          | Balb/C        | Brain+Testis cDNA      | NCBI                          | 26331271                               |
| EF043979                 | VAMP1a                                                         | 356             | A003505        | Vesicle protein                             | 10374205       | Mouse          | Balb/C        | Brain+Testis cDNA      | NCBI                          | 1402872                                |
| EF043980                 | VAMP2                                                          | 350             | A003506        | Vesicle protein                             | 10373498       | Mouse          | Balb/C        | Brain+Testis cDNA      | NCBI                          | AF007168                               |
| EF043981                 | Cellubrevin                                                    | 311             | A003507        | Vesicle protein                             | 10373509       | Mouse          | Balb/C        | Brain+Testis cDNA      | NCBI                          | 31340659                               |
| EF043982                 | VAMP4                                                          | 425             | A003508        | Vesicle protein                             | 10373500       | Mouse          | Balb/C        | Brain+Testis cDNA      | NCBI                          | AF061516                               |
| EF043983                 | VAMP5                                                          | 308             | A003509        | Vesicle protein                             | 10374422       | Mouse          | Balb/C        | Brain+Testis cDNA      | NCBI                          | AF035643                               |
| EF043984                 | VAMP7                                                          | 662             | A003510        | Vesicle protein                             | 10373502       | Mouse          | Balb/C        | Brain+Testis cDNA      | NCBI                          | 13277734                               |
| EF043985                 | VAMP8                                                          | 305             | A003511        | Vesicle protein                             | 10374423       | Mouse          | Balb/C        | Brain+Testis cDNA      | NCBI                          | AF053724                               |
| EF043986                 | sec22                                                          | 647             | A003512        | Vesicle protein                             | 10374207       | Mouse          | Balb/C        | Brain+Testis cDNA      | NCBI                          | 1907385                                |
| EF043987                 | YANK2                                                          | 1244            | A003596        | Protein kinase, Ser/Thr                     | 10373618       | Mouse          | Balb/C        | Brain+Testis cDNA      | NCBI                          | 7161863                                |
| EF043988                 | BRSK2                                                          | 1109            | A003618        | Protein kinase, Ser/Thr                     | 10627631       | Mouse          | Balb/C        | Brain+Testis cDNA      | NCBI                          | 25031982                               |
| EF043989                 | BRSK2                                                          | 2027            | A003618        | Protein kinase, Ser/Thr                     | 10627932       | Mouse          | Balb/C        | Brain+Testis cDNA      | NCBI                          | 28482563                               |
| EF043990                 | CDK11                                                          | 1505            | A003619        | Protein kinase, Ser/Thr                     | 10627637       | Mouse          | Balb/C        | Brain+Testis cDNA      | NCBI                          | 25051790                               |
| EF043991                 | CDKL3                                                          | 1373            | A003620        | Protein kinase, Ser/Thr                     | 10627639       | Mouse          | Balb/C        | Brain+Testis cDNA      | NCBI                          | 23621365                               |
| EF043992                 | Dcamkl2                                                        | 2270            | A003622        | Protein kinase, Ser/Thr                     | 10627725       | Mouse          | Balb/C        | Brain+Testis cDNA      | NCBI                          | 34784918                               |
| EF043993                 | DCAMKL3                                                        | 1859            | A003623        | Protein kinase, Ser/Thr                     | 10627644       | Mouse          | Balb/C        | Brain+Testis cDNA      | NCBI                          | 27370431                               |
| EF043994                 | NRBP2                                                          | 776             | A003634        | Protein kinase, Ser/Thr                     | 10627654       | Mouse          | Balb/C        | Brain+Testis cDNA      | NCBI                          | 15079263                               |
| EF043995                 | RPS6KC1/Rsk1                                                   | 1763            | A003637        | Protein kinase, Ser/Thr                     | 10627661       | Mouse          | Balb/C        | Brain+Testis cDNA      | NCBI                          | 26336834                               |
| EF043996                 | RPS6KC2/Rsk2                                                   | 1634            | A003638        | Protein kinase, Ser/Thr                     | 10627663       | Mouse          | Balb/C        | Brain+Testis cDNA      | NCBI                          | 20073154                               |
| EF043997                 | SgK496                                                         | 1544            | A003639        | Protein kinase, Ser/Thr                     | 10627735       | Mouse          | Balb/C        | Brain+Testis cDNA      | NCBI                          | 20910262                               |
| EF043998                 | SgK496                                                         | 1544            | A003639        | Protein kinase, Ser/Thr                     | 10627666       | Mouse          | Balb/C        | Brain+Testis cDNA      | NCBI                          | 20910262                               |

| <u>GenBank Accession</u> | <u>Gene Name</u>                                         | <u>ORF size</u> | <u>AFCs ID</u> | <u>Protein category</u>                   | <u>ATCC ID</u> | <u>Species</u> | <u>Strain</u> | <u>Source material</u> | <u>Target sequence source</u>                                   | <u>Target sequence ID (Genbank GI)</u> |
|--------------------------|----------------------------------------------------------|-----------------|----------------|-------------------------------------------|----------------|----------------|---------------|------------------------|-----------------------------------------------------------------|----------------------------------------|
| EF043999                 | STLK5                                                    | 1184            | A003641        | Protein kinase, Ser/Thr                   | 10627668       | Mouse          | Balb/C        | Brain+Testis cDNA      | NCBI                                                            | 21312399                               |
| EF044000                 | Trb1                                                     | 1118            | A003642        | Protein kinase, Ser/Thr                   | 10627676       | Mouse          | Balb/C        | Brain+Testis cDNA      | NCBI                                                            | 21362354                               |
| EF044001                 | Trb2                                                     | 1031            | A003643        | Protein kinase, Ser/Thr                   | 10627677       | Mouse          | Balb/C        | Brain+Testis cDNA      | NCBI                                                            | 21362350                               |
| EF044002                 | SCYL3                                                    | 2207            | A003776        | Protein kinase, Ser/Thr                   | 10627761       | Mouse          | Balb/C        | Brain+Testis cDNA      | <a href="http://kinase.com/mouse/">http://kinase.com/mouse/</a> |                                        |
| EF044003                 | Wee1B                                                    | 1667            | A003777        | Protein kinase, Ser/Thr                   | 10627763       | Mouse          | Balb/C        | Brain+Testis cDNA      | <a href="http://kinase.com/mouse/">http://kinase.com/mouse/</a> |                                        |
| EF044004                 | Calmodulin-dependent protein kinase I beta               | 1031            | A003815        | Protein kinase, Ser/Thr (non-receptor)    | 10627170       | Mouse          | Balb/C        | Brain+Testis cDNA      | NCBI                                                            | 6753247                                |
| EF044005                 | Tih1                                                     | 374             |                | Cytosolic, misc.                          | 10627295       | Mouse          | Balb/c        | Brain+Testis cDNA      | NCBI                                                            | 5326875                                |
| EF044006                 | SMOK2                                                    | 1511            |                | Protein kinase, Ser/Thr                   | 10627281       | Mouse          | Balb/C        | Brain+Testis cDNA      | NCBI                                                            | 6453612                                |
| EF044007                 | Mus musculus RIKEN cDNA 4921528G01 gene                  | 1772            |                | Guanine nucleotide exchange factor, misc. | 10627264       | Mouse          | Balb/c        | Brain+Testis cDNA      | NCBI                                                            | 13357217                               |
| EF044008                 | PHR1 isoform 4                                           | 569             |                | Cytosolic, misc.                          | 10627294       | Mouse          | Balb/c        | Brain+Testis cDNA      | NCBI                                                            | 4926915                                |
| EF044009                 | Pleckstrin homology domain containing, family B member 1 | 731             |                | Cytosolic, misc.                          | 10627266       | Mouse          | Balb/c        | Brain+Testis cDNA      | NCBI                                                            | 7305378                                |
| EF044010                 | SMOK1                                                    | 1454            |                | Protein kinase, Ser/Thr                   | 10627177       | Mouse          | Balb/C        | Brain+Testis cDNA      | NCBI                                                            | 6453618                                |
| EF044011                 | A6r/Twinfillin-2                                         | 1049            |                | Protein kinase, Ser/Thr                   | 10627686       | Mouse          | Balb/C        | Brain+Testis cDNA      | <a href="http://kinase.com/mouse/">http://kinase.com/mouse/</a> |                                        |
| EF044012                 | ADCK1                                                    | 1577            |                | Protein kinase, Ser/Thr                   | 10627739       | Mouse          | Balb/C        | Brain+Testis cDNA      | <a href="http://kinase.com/mouse/">http://kinase.com/mouse/</a> |                                        |
| EF044013                 | ADCK2                                                    | 1853            |                | Protein kinase, Ser/Thr                   | 10627937       | Mouse          | Balb/C        | Brain+Testis cDNA      | <a href="http://kinase.com/mouse/">http://kinase.com/mouse/</a> |                                        |
| EF044014                 | ADCK3                                                    | 1937            |                | Protein kinase, Ser/Thr                   | 10627687       | Mouse          | Balb/C        | Brain+Testis cDNA      | <a href="http://kinase.com/mouse/">http://kinase.com/mouse/</a> |                                        |
| EF044015                 | ADCK4                                                    | 1601            |                | Protein kinase, Ser/Thr                   | 10627688       | Mouse          | Balb/C        | Brain+Testis cDNA      | <a href="http://kinase.com/mouse/">http://kinase.com/mouse/</a> |                                        |
| EF044016                 | ADCK5                                                    | 1748            |                | Protein kinase, Ser/Thr                   | 10627742       | Mouse          | Balb/C        | Brain+Testis cDNA      | <a href="http://kinase.com/mouse/">http://kinase.com/mouse/</a> |                                        |
| EF044017                 | CK2a1-rs                                                 | 1175            |                | Protein kinase, Ser/Thr                   | 10627693       | Mouse          | Balb/C        | Brain+Testis cDNA      | <a href="http://kinase.com/mouse/">http://kinase.com/mouse/</a> |                                        |
| EF044018                 | CYGX/CK2a                                                | 1175            |                | Protein kinase, Ser/Thr                   | 10627745       | Mouse          | Balb/C        | Brain+Testis cDNA      | <a href="http://kinase.com/mouse/">http://kinase.com/mouse/</a> |                                        |
| EF044019                 | G11/Stk19                                                | 764             |                | Protein kinase, Ser/Thr                   | 10627695       | Mouse          | Balb/C        | Brain+Testis cDNA      | <a href="http://kinase.com/mouse/">http://kinase.com/mouse/</a> |                                        |
| EF044020                 | H11/HSP8                                                 | 590             |                | Protein kinase, Ser/Thr                   | 10627930       | Mouse          | Balb/C        | Brain+Testis cDNA      | <a href="http://kinase.com/mouse/">http://kinase.com/mouse/</a> |                                        |
| EF044021                 | HIPK4                                                    | 1625            |                | Protein kinase, Ser/Thr                   | 10627747       | Mouse          | Balb/C        | Brain+Testis cDNA      | <a href="http://kinase.com/mouse/">http://kinase.com/mouse/</a> |                                        |
| EF044022                 | MarkmA1                                                  | 1493            |                | Protein kinase, Ser/Thr                   | 10627698       | Mouse          | Balb/C        | Brain+Testis cDNA      | <a href="http://kinase.com/mouse/">http://kinase.com/mouse/</a> |                                        |
| EF044023                 | MarkmA10                                                 | 1379            |                | Protein kinase, Ser/Thr                   | 10627700       | Mouse          | Balb/C        | Brain+Testis cDNA      | <a href="http://kinase.com/mouse/">http://kinase.com/mouse/</a> |                                        |
| EF044024                 | MarkmA2                                                  | 1418            |                | Protein kinase, Ser/Thr                   | 10627702       | Mouse          | Balb/C        | Brain+Testis cDNA      | <a href="http://kinase.com/mouse/">http://kinase.com/mouse/</a> |                                        |

| <u>GenBank Accession</u> | <u>Gene Name</u>                          | <u>ORF size</u> | <u>AFCS ID</u> | <u>Protein category</u> | <u>ATCC ID</u> | <u>Species</u> | <u>Strain</u> | <u>Source material</u> | <u>Target sequence source</u>                                   | <u>Target sequence ID (Genbank GI)</u> |
|--------------------------|-------------------------------------------|-----------------|----------------|-------------------------|----------------|----------------|---------------|------------------------|-----------------------------------------------------------------|----------------------------------------|
| EF044025                 | MarkmA3                                   | 1514            |                | Protein kinase, Ser/Thr | 10627704       | Mouse          | Balb/C        | Brain+Testis cDNA      | <a href="http://kinase.com/mouse/">http://kinase.com/mouse/</a> |                                        |
| EF044026                 | MarkmA8                                   | 1301            |                | Protein kinase, Ser/Thr | 10627706       | Mouse          | Balb/C        | Brain+Testis cDNA      | <a href="http://kinase.com/mouse/">http://kinase.com/mouse/</a> |                                        |
| EF044027                 | MarkmC1                                   | 905             |                | Protein kinase, Ser/Thr | 10627708       | Mouse          | Balb/C        | Brain+Testis cDNA      | <a href="http://kinase.com/mouse/">http://kinase.com/mouse/</a> |                                        |
| EF044028                 | MarkmE3                                   | 734             |                | Protein kinase, Ser/Thr | 10627750       | Mouse          | Balb/C        | Brain+Testis cDNA      | <a href="http://kinase.com/mouse/">http://kinase.com/mouse/</a> |                                        |
| EF044029                 | PINK1                                     | 1742            |                | Protein kinase, Ser/Thr | 10627756       | Mouse          | Balb/C        | Brain+Testis cDNA      | <a href="http://kinase.com/mouse/">http://kinase.com/mouse/</a> |                                        |
| EF044030                 | RIOK1                                     | 1703            |                | Protein kinase, Ser/Thr | 10627758       | Mouse          | Balb/C        | Brain+Testis cDNA      | <a href="http://kinase.com/mouse/">http://kinase.com/mouse/</a> |                                        |
| EF044031                 | RIOK2                                     | 1643            |                | Protein kinase, Ser/Thr | 10627759       | Mouse          | Balb/C        | Brain+Testis cDNA      | <a href="http://kinase.com/mouse/">http://kinase.com/mouse/</a> |                                        |
| EF044032                 | SGK069                                    | 1088            |                | Protein kinase, Ser/Thr | 10627712       | Mouse          | Balb/C        | Brain+Testis cDNA      | <a href="http://kinase.com/mouse/">http://kinase.com/mouse/</a> |                                        |
| EF044033                 | SGK196                                    | 1049            |                | Protein kinase, Ser/Thr | 10627714       | Mouse          | Balb/C        | Brain+Testis cDNA      | <a href="http://kinase.com/mouse/">http://kinase.com/mouse/</a> |                                        |
| EF044034                 | SGK396/Twinfilin-2                        | 1049            |                | Protein kinase, Ser/Thr | 10627716       | Mouse          | Balb/C        | Brain+Testis cDNA      | <a href="http://kinase.com/mouse/">http://kinase.com/mouse/</a> |                                        |
| EF044035                 | SGK495                                    | 1307            |                | Protein kinase, Ser/Thr | 10627718       | Mouse          | Balb/C        | Brain+Testis cDNA      | <a href="http://kinase.com/mouse/">http://kinase.com/mouse/</a> |                                        |
| EF044036                 | STK33                                     | 1475            |                | Protein kinase, Ser/Thr | 10627720       | Mouse          | Balb/C        | Brain+Testis cDNA      | <a href="http://kinase.com/mouse/">http://kinase.com/mouse/</a> |                                        |
| EF044037                 | BetaGlcNAc beta 1,4-galactosyltransferase | 1199            |                | Galactosyltransferase   | 10373507       | Mouse          | Balb/C        | Brain+Testis cDNA      | NCBI                                                            | 31981763                               |

## Supplementary Table 5

Details of AfCS subcellular markers available from the ATCC (MBA-91) in 96-well plate format. This set of subcellular localization markers comprises 64 expression plasmids developed by the AfCS as organelle markers for microscopy studies in mammalian cells (<http://www.signaling-gateway.org/reports/v1/DA0002/DA0002.pdf>). The plasmids encode either full-length or partial cDNAs tagged with a choice of fluorescent marker (either CFP or YFP). In many cases, the organelle markers are provided as a set of 4 to also provide a choice of promoter (CMV or EF1). <sup>1</sup>Species gene was isolated from. M: Mus musculus, H: Homo sapiens, Y: Yeast, V: Viral. <sup>2</sup>Gene description- FL: full length, CT## : C-terminal ## amino acids (CT99=C-terminal 99 aa), NT## :N-terminal ## amino acids (NT31=N-terminal 31 amino acids), NLS: nuclear localization sequence. <sup>3</sup>Form of gene. T: Clone contains a termination codon at the end of the targeted ORF. N: Clone does not contain a termination codon at the end of the targeted ORF.

| <u>Well</u> | <u>Gene name</u> | <u>Spec</u> <sup>1</sup> | <u>Descrip</u> <sup>2</sup> | <u>Form</u> <sup>3</sup> | <u>Putative target organelle</u> | <u>Promoter</u> | <u>Tag</u> | <u>Vector size</u> | <u>Insert size</u> |
|-------------|------------------|--------------------------|-----------------------------|--------------------------|----------------------------------|-----------------|------------|--------------------|--------------------|
| A1          | Alpha1 tubulin   | M                        | FL                          | T                        | Microtubules                     | EF1             | CFP        | 6772               | 1355               |
| A2          | Furin            | M                        | CT99                        | T                        | Trans-golgi network              | CMV             | YFP        | 5212               | 299                |
| A3          | Alpha1 tubulin   | M                        | FL                          | T                        | Microtubules                     | EF1             | YFP        | 6772               | 1355               |
| A4          | Gamma tubulin    | M                        | FL                          | N                        | Centrosome                       | EF1             | CFP        | 6774               | 1355               |
| A5          | Gamma tubulin    | M                        | FL                          | N                        | Centrosome                       | CMV             | CFP        | 6157               | 1355               |
| A6          | Gamma tubulin    | M                        | FL                          | N                        | Centrosome                       | EF1             | YFP        | 6774               | 1355               |
| A7          | VAMP1a           | M                        | FL                          | T                        | Exocytic and endocytic pathways  | EF1             | CFP        | 5773               | 356                |
| A8          | VAMP1a           | M                        | FL                          | T                        | Exocytic and endocytic pathways  | EF1             | YFP        | 5773               | 356                |
| A9          | Lamin B receptor | M                        | FL                          | N                        | Nuclear membrane                 | CMV             | CFP        | 5530               | 728                |
| A10         | Caveolin-1       | M                        | FL                          | N                        | Caveolae                         | CMV             | CFP        | 5335               | 533                |
| A11         | Caveolin-1       | M                        | FL                          | N                        | Caveolae                         | EF1             | CFP        | 5952               | 533                |
| A12         | Furin            | M                        | CT99                        | T                        | Trans-golgi network              | CMV             | CFP        | 5212               | 299                |
| B1          | Lamin B receptor | M                        | FL                          | N                        | Nuclear membrane                 | CMV             | YFP        | 5530               | 728                |
| B2          | Caveolin-1       | M                        | FL                          | N                        | Caveolae                         | EF1             | YFP        | 5952               | 533                |
| B3          | Caveolin-1       | M                        | FL                          | N                        | Caveolae                         | CMV             | YFP        | 5335               | 533                |
| B4          | Gamma tubulin    | M                        | FL                          | N                        | Centrosome                       | CMV             | YFP        | 6157               | 1355               |
| B5          | Alpha1 tubulin   | M                        | FL                          | T                        | Microtubules                     | CMV             | YFP        | 6155               | 1355               |
| B6          | Lamin B receptor | M                        | FL                          | N                        | Nuclear membrane                 | EF1             | CFP        | 6147               | 728                |
| B7          | Lamin B receptor | M                        | FL                          | N                        | Nuclear membrane                 | EF1             | YFP        | 6147               | 728                |
| B8          | Alpha1 tubulin   | M                        | FL                          | T                        | Microtubules                     | CMV             | CFP        | 6155               | 1355               |
| B9          | VAMP2            | M                        | FL                          | T                        | Exocytic and endocytic pathways  | EF1             | CFP        | 5767               | 350                |

| <b>Well</b> | <b>Gene name</b>             | <b>Spec<sup>1</sup></b> | <b>Descrip<sup>2</sup></b> | <b>Form<sup>3</sup></b> | <b>Putative target organelle</b> | <b>Promoter</b> | <b>Tag</b> | <b>Vector size</b> | <b>Insert size</b> |
|-------------|------------------------------|-------------------------|----------------------------|-------------------------|----------------------------------|-----------------|------------|--------------------|--------------------|
| B10         | VAMP2                        | M                       | FL                         | T                       | Exocytic and endocytic pathways  | EF1             | YFP        | 5767               | 350                |
| B11         | VAMP4                        | M                       | FL                         | T                       | Exocytic and endocytic pathways  | EF1             | CFP        | 5842               | 425                |
| B12         | VAMP4                        | M                       | FL                         | T                       | Exocytic and endocytic pathways  | EF1             | YFP        | 5842               | 425                |
| C1          | VAMP5                        | M                       | FL                         | T                       | Exocytic and endocytic pathways  | EF1             | CFP        | 5725               | 308                |
| C2          | VAMP5                        | M                       | FL                         | T                       | Exocytic and endocytic pathways  | EF1             | YFP        | 5725               | 308                |
| C3          | VAMP7                        | M                       | FL                         | T                       | Exocytic and endocytic pathways  | EF1             | CFP        | 6079               | 662                |
| C4          | VAMP7                        | M                       | FL                         | T                       | Exocytic and endocytic pathways  | EF1             | YFP        | 6079               | 662                |
| C5          | VAMP8                        | M                       | FL                         | T                       | Exocytic and endocytic pathways  | EF1             | CFP        | 5722               | 305                |
| C6          | VAMP8                        | M                       | FL                         | T                       | Exocytic and endocytic pathways  | EF1             | YFP        | 5722               | 305                |
| C7          | sec22                        | M                       | FL                         | T                       | Exocytic and endocytic pathways  | EF1             | CFP        | 6064               | 647                |
| C8          | sec22                        | M                       | FL                         | T                       | Exocytic and endocytic pathways  | EF1             | YFP        | 6064               | 647                |
| C9          | Arp3                         | M                       | FL                         | T                       | Polymerizing actin               | EF1             | CFP        | 6703               | 1256               |
| C10         | Arp3                         | M                       | FL                         | T                       | Polymerizing actin               | EF1             | YFP        | 6703               | 1256               |
| C11         | K-Ras2                       | H                       | CT19                       | T                       | Plasma membrane                  | EF1             | CFP        | 5507               | 63                 |
| C12         | K-Ras2                       | H                       | CT19                       | T                       | Plasma membrane                  | EF1             | YFP        | 5507               | 63                 |
| D1          | Golgin 245                   | M                       | CT72                       | T                       | Golgi                            | CMV             | CFP        | 5042               | 215                |
| D2          | Golgin 245                   | M                       | CT72                       | T                       | Golgi                            | CMV             | YFP        | 5042               | 215                |
| D3          | Golgin 245                   | M                       | CT72                       | T                       | Golgi                            | EF1             | CFP        | 5659               | 215                |
| D4          | Golgin 245                   | M                       | CT72                       | T                       | Golgi                            | EF1             | YFP        | 5659               | 215                |
| D5          | Cyt. c oxidase-subunit VIIIa | M                       | NT31                       | N                       | Mitochondria                     | CMV             | YFP        | 4912               | 92                 |
| D6          | Cyt. c oxidase-subunit VIIIa | M                       | NT31                       | N                       | Mitochondria                     | CMV             | CFP        | 4912               | 92                 |
| D7          | Cyt. c oxidase-subunit VIIIa | M                       | NT31                       | N                       | Mitochondria                     | EF1             | YFP        | 5529               | 92                 |
| D8          | Cyt. c oxidase-subunit VIIIa | M                       | NT31                       | N                       | Mitochondria                     | EF1             | CFP        | 5529               | 92                 |
| D9          | Cyt. c oxidase-subunit IV    | Y                       | NT12                       | N                       | Mitochondria                     | CMV             | YFP        | 4855               | 35                 |
| D10         | Cyt. c oxidase-subunit IV    | Y                       | NT12                       | N                       | Mitochondria                     | CMV             | CFP        | 4855               | 35                 |
| D11         | Cyt. c oxidase-subunit IV    | Y                       | NT12                       | N                       | Mitochondria                     | EF1             | YFP        | 5472               | 35                 |
| D12         | Cyt. c oxidase-subunit IV    | Y                       | NT12                       | N                       | Mitochondria                     | EF1             | CFP        | 5472               | 35                 |
| E1          | Vimentin                     | M                       | FL                         | N                       | Intermediate filaments           | CMV             | YFP        | 6202               | 1400               |
| E2          | Vimentin                     | M                       | FL                         | N                       | Intermediate filaments           | CMV             | CFP        | 6202               | 1400               |
| E3          | Vimentin                     | M                       | FL                         | N                       | Intermediate filaments           | EF1             | YFP        | 6819               | 1400               |
| E4          | Vimentin                     | M                       | FL                         | N                       | Intermediate filaments           | EF1             | CFP        | 6819               | 1400               |

| <b>Well</b> | <b>Gene name</b>              | <b>Spec<sup>1</sup></b> | <b>Descrip<sup>2</sup></b> | <b>Form<sup>3</sup></b> | <b>Putative target organelle</b> | <b>Promoter</b> | <b>Tag</b> | <b>Vector size</b> | <b>Insert size</b> |
|-------------|-------------------------------|-------------------------|----------------------------|-------------------------|----------------------------------|-----------------|------------|--------------------|--------------------|
| E5          | Cellubrevin                   | M                       | FL                         | T                       | Recycling endosomes              | CMV             | YFP        | 5111               | 311                |
| E6          | Cellubrevin                   | M                       | FL                         | T                       | Recycling endosomes              | CMV             | CFP        | 5111               | 311                |
| E7          | Cellubrevin                   | M                       | FL                         | T                       | Recycling endosomes              | EF1             | CFP        | 5728               | 311                |
| E8          | Cellubrevin                   | M                       | FL                         | T                       | Recycling endosomes              | EF1             | YFP        | 5728               | 311                |
| E9          | SV40 Lg T antigen NLS triplet | V                       | NLS                        | T                       | Nucleus                          | EF1             | YFP        | 9158               | 81                 |
| E10         | SV40 Lg T antigen NLS triplet | V                       | NLS                        | T                       | Nucleus                          | EF1             | CFP        | 9158               | 81                 |
| E11         | SV40 Lg T antigen NLS triplet | V                       | NLS                        | T                       | Nucleus                          | CMV             | YFP        | 8541               | 81                 |
| E12         | SV40 Lg T antigen NLS triplet | V                       | NLS                        | T                       | Nucleus                          | CMV             | CFP        | 8541               | 81                 |
| F1          | Six repeats of YFP            |                         |                            |                         | Cytosol                          | CMV             | YFP        | 8472               |                    |
| F2          | Six repeats of CFP            |                         |                            |                         | Cytosol                          | CMV             | CFP        | 8472               |                    |
| F3          | Six repeats of YFP            |                         |                            |                         | Cytosol                          | EF1             | YFP        | 9089               |                    |
| F4          | Six repeats of CFP            |                         |                            |                         | Cytosol                          | EF1             | CFP        | 9089               |                    |
